1 **A model of preferential pairing between epithelial and dendritic cells in**  
2 **thymic antigen transfer**

3

4 Matouš Vobořil<sup>1,#</sup>, Jiří Březina<sup>1,2,#</sup>, Tomáš Brabec<sup>1</sup>, Jan Dobeš<sup>1,2</sup>, Ondřej Ballek<sup>1</sup>, Martina  
5 Dobešová<sup>1</sup>, Jasper Manning<sup>1</sup>, Richard S. Blumberg<sup>3</sup> and Dominik Filipp<sup>1,\*</sup>

6

7 *<sup>1</sup>Laboratory of Immunobiology, Institute of Molecular Genetics of the Czech Academy of*  
8 *Sciences, Prague, Czech Republic*

9 *<sup>2</sup>Department of Cell Biology, Charles University, Faculty of Science, Prague, Czech Republic*

10 *<sup>3</sup>Division of Gastroenterology, Hepatology, and Endoscopy, Department of Medicine, Brigham*  
11 *and Women's Hospital, Harvard Medical School, Boston, MA, USA*

12

13 #These authors contributed equally

14 \*Corresponding author, email: [dominik.filipp@img.cas.cz](mailto:dominik.filipp@img.cas.cz)

15

16 **Key words:** thymus, central tolerance, thymic epithelial cells, dendritic cells, cooperative  
17 antigen transfer

## 18 **Abstract**

19 Medullary thymic epithelial cells (mTECs) which produce and present self-antigens are  
20 essential for the establishment of central tolerance. Since mTEC numbers are limited, their  
21 function is complemented by thymic dendritic cells (DCs), which transfer mTEC-produced  
22 self-antigens via cooperative antigen transfer (CAT). While CAT is required for effective T  
23 cell selection, many aspects remain enigmatic. Given the recently described heterogeneity of  
24 mTECs and DCs, it is unclear whether the antigen acquisition from a particular TEC subset is  
25 mediated by preferential pairing with specific subset of DCs. Using several relevant Cre-based  
26 mouse models controlling the expression of fluorescent proteins, we found that in regards to  
27 CAT, each subset of thymic DCs preferentially targets distinct mTEC subset(s) and  
28 importantly, XCR1<sup>+</sup> activated DCs represented the most potent subset in CAT. Interestingly,  
29 one thymic DC can acquire antigen repetitively and of these, monocyte-derived DCs (moDC)  
30 were determined to be the most efficient in repetitive CAT. moDCs also represented the most  
31 potent DC subset in the acquisition of antigen from other DCs. These findings suggest a  
32 preferential pairing model for the distribution of mTEC-derived antigens among distinct  
33 populations of thymic DCs.

## 34 **Introduction**

35 Central tolerance, which operates during T-cell development in the thymus, can result in the  
36 elimination of self-reactive T-cells or their deviation into thymic regulatory T-cell (tTreg)  
37 lineage (Klein et al., 2019). The underlying principle of this event compels immature T-cells  
38 to test their T-cell receptor (TCR) for potential self-reactivity through scanning of self-antigens  
39 which are presented by antigen presenting cells (APCs). Among all thymic APCs, thymic  
40 epithelial cells (TECs) are central in this selection process (Klein et al., 2014). Based on their  
41 localization within the thymus, TECs are generally divided into two major populations: cortical  
42 TECs (cTEC) and medullary TECs (mTECs) (Derbinski et al., 2001). Recently, single-cell  
43 RNA sequencing (scRNAseq) revealed an unexpected heterogeneity of mTECs with at least  
44 five distinct subsets defined by their developmental stage, transcription profile, and function  
45 (referred to as mTEC-I, -II, -IIIa, IIIb, and Tuft cells) (Baran-Gale et al., 2020; Bornstein et al.,  
46 2018; Miller et al., 2018).

47 Due to their unique ability to express and present more than 80% of the protein-coding genome,  
48 mTECs are well-adapted to serve as a principal self-antigen-producing cellular component of  
49 central tolerance (Brennecke et al., 2015; Meredith et al., 2015; Sansom et al., 2014). This is  
50 facilitated, in part, by the expression of the Autoimmune regulator (Aire). Aire controls the  
51 gene expression of a large set of tissue restricted antigens (TRAs) found only in the immune  
52 periphery (Derbinski et al., 2001). Interestingly, an effective display of a complete set of  
53 thymically expressed TRAs is achieved by their combinatorial mosaic expression by each  
54 mTEC with any particular TRA expressed by only 1-3% of mTECs (Derbinski et al., 2008)  
55 while a single mTEC is capable of expressing up to 300 different TRAs (Meredith et al., 2015;  
56 Sansom et al., 2014). However, mTEC subsets are not equal in terms of Aire expression and  
57 TRA presentation. During their progression through mTEC-I, -II, -IIIa, and -IIIb stages, the  
58 highest Aire and TRA expression is observed in mTEC-II, historically referred to as mTEC<sup>high</sup>.  
59 As mTEC-II enter pre-post Aire and post-Aire phases (phase -IIIa and -IIIb, respectively), they  
60 downregulate the expression of Aire, although their TRA protein levels remain high, making  
61 them available for further use by other cells (Kadouri et al., 2020). The extent of the expression  
62 of TRA in mTEC-I (referred to as mTEC<sup>low</sup>) is limited (Baran-Gale et al., 2020; Bornstein et  
63 al., 2018).

64 The relatively low number of mTECs in comparison to the sheer number of developing T-cells,  
65 coupled to mosaic and stage-restricted expression of TRAs, places significant constraints on

66 the process of T cell selection. To overcome this limitation, TRAs from apoptotic mTECs can  
67 be transferred into, and indirectly presented to T-cells, by thymic dendritic cells (DCs) via the  
68 process of cooperative antigen transfer (CAT) (Gallegos & Bevan, 2004; Koble & Kyewski,  
69 2009). It has been demonstrated that CAT is critical for the establishment of central tolerance  
70 to mTEC-derived self-antigens (Lancaster et al., 2019; Perry et al., 2014; Perry et al., 2018).  
71 Despite its importance, the elucidation of its basic principles has been hampered by the  
72 complexity of thymic DC populations.

73 In general, thymic DCs can be divided into two major categories – plasmacytoid DCs (pDCs)  
74 and classical DCs (cDCs), the latter of which can be subdivided into cDC1 and cDC2 subsets  
75 (Guilliams et al., 2014). Previous studies have shown that these DC subsets vary in their  
76 capacity to acquire mTEC-derived antigens (Kroger et al., 2017; Lancaster et al., 2019; Vobořil  
77 et al., 2020). cDC1s were shown to strongly acquire GFP antigen from mTEC in *Aire-GFP*  
78 mouse model (Perry et al., 2018). On the other hand, the cDC2 subset robustly acquires mOVA  
79 antigen in the *RIP-mOVA* mouse model (Lancaster et al., 2019). Since the expression of Aire-  
80 driven GFP and mOVA in the thymus was largely restricted to Aire<sup>+</sup> mTECs (Gardner et al.,  
81 2008) and mTEC<sup>Low</sup>/post-Aire mTECs, respectively, (Mouri et al., 2017), it has been inferred  
82 that distinct subsets of thymic DCs acquire antigens from distinct subsets of mTECs. However,  
83 our recent scRNAseq analysis along with data from the human thymus cell atlas study  
84 unearthed a much broader heterogeneity of DCs in the thymus of mice and humans (Park et al.,  
85 2020; Vobořil et al., 2020). Thus, a more comprehensive analysis is needed to determine the  
86 mode of CAT between defined subsets of TECs and DCs as well as other means of thymic  
87 antigen spreading.

88 In this study, we used several Cre reporter mouse models in which the expression of fluorescent  
89 TdTOMATO protein (TdTOM) is restricted to different subsets of TECs. We present evidence  
90 suggesting that distinct subsets of thymic DCs preferentially acquire TdTOM from a certain  
91 subset of TECs. Using the Confetti<sup>Brainbow2.1</sup> system, we have also shown that CAT can occur  
92 as a repetitive event whereby a single thymic CD11c<sup>+</sup> cell can acquire antigen from two or  
93 more individual TECs. Furthermore, based on our data, we postulate that antigen transfer can  
94 also occur between DC subsets themselves. Thus, this dataset suggests a deterministic model  
95 of preferential engagement of specific mTEC and DC subsets for directional thymic antigen  
96 spreading.

## 97 **Results**

### 98 **Thymic epithelial cell models of cooperative antigen transfer.**

99 The robustness of scRNAseq has yielded in recent years comprehensive knowledge in regards  
100 to detailing thymic APCs inventory as well as a list of suitable markers (Baran-Gale et al.,  
101 2020; Bautista et al., 2021; Bornstein et al., 2018; Dhalla et al., 2020; Park et al., 2020; Vobořil  
102 et al., 2020; Wells et al., 2020). The combinatorial specificity of these markers has led us to  
103 design novel flow cytometry gating strategies that allow us to study CAT.

104 To understand antigen transfer trajectories within the intricate network of all subsets of TECs  
105 and CD11c<sup>+</sup> APCs identified thus far, we first established mouse models where cytoplasmic  
106 expression of TdTOM is preferentially confined to distinct TEC subsets. By crossing three  
107 previously characterized Cre-based mouse models with a ROSA26<sup>TdTOM</sup> mouse strain, we  
108 generated: (i) Foxn1<sup>Cre</sup>ROSA<sup>26TdTOM</sup> (Foxn1<sup>Cre</sup>) mice which express TdTOM in all populations  
109 of CD45<sup>-</sup>EpCAM<sup>+</sup> TECs (Gordon et al., 2007; Vobořil et al., 2020), (ii) Csnβ<sup>Cre</sup>ROSA26<sup>TdTOM</sup>  
110 (Csnβ<sup>Cre</sup>) with Casein β (Csnβ) loci operating as an Aire-independent TRA which confines  
111 TdTOM expression to mTEC<sup>High</sup> subset and their closest progenitors and progeny (Bornstein  
112 et al., 2018; Tykocinski et al., 2010), and (iii) Defa6<sup>iCre</sup>ROSA26<sup>TdTOM</sup> (Defa6<sup>iCre</sup>). The latter  
113 model represents the “classical” Aire-dependent TRA model, in which TdTOM is expressed in  
114 1-3% of Aire<sup>+</sup> mTEC<sup>High</sup> cells as well as Post-Aire mTEC progeny (Adolph et al., 2013; Dobeš  
115 et al., 2015) (Figure 1b-c).

116 The gating strategy implemented to assess the frequency of TdTOM-labelled CD45<sup>-</sup>EpCAM<sup>+</sup>  
117 TEC subsets in the Cre models introduced above (Figure 1a-c) is shown in Supplementary  
118 Figure 1a. Six subsets of TECs were distinguished: cTEC, mTEC<sup>Low</sup>, mTEC<sup>High</sup>, two subsets  
119 of LY6D<sup>+</sup> terminally differentiated subsets: Pre-post Aire and Post-Aire mTECs, and L1CAM<sup>+</sup>  
120 thymic Tuft cells. The results confirmed the differences among the TEC subsets found within  
121 the thymic CD45<sup>-</sup>EpCAM<sup>+</sup>TdTOM<sup>+</sup> population in the three generated mouse models. Whereas  
122 cTEC and mTEC<sup>Low</sup> subsets were overrepresented in Foxn1<sup>Cre</sup>, and the mTEC<sup>High</sup> subset in the  
123 Csnβ<sup>Cre</sup> model, the frequencies of Pre-post Aire, Post-Aire, and Tuft mTECs were increased in  
124 the Defa6<sup>iCre</sup> model (Figure 1d-e). This data validated the utility of the Cre-based  
125 ROSA26<sup>TdTOM</sup> mouse models to study CAT, since the expression of TdTOM protein was in  
126 each model predictably enriched in different subsets of TECs.

127

## 128 **Antigen transfer of TdTOM to thymic dendritic cells.**

129 Having characterized the distinct distribution of TdTOM in TEC subsets in our Cre-based  
130 ROSA26<sup>TdTOM</sup> mouse models, we next tested the distribution of the TdTOM among its  
131 acceptors, the thymic population of CD11c<sup>+</sup> cells (Figure 2a). As shown previously (Vobořil et  
132 al., 2020) and in Figures 2b and c, TdTOM is mostly acquired by CD11c<sup>+</sup> cells. The robustness  
133 of this transfer which is heavily dependent on the type of Cre-based ROSA26<sup>TdTOM</sup> mouse  
134 model was then examined. Whereas TdTOM positivity was observed in ~6% of CD11c<sup>+</sup> cells  
135 in the Foxn1<sup>Cre</sup> model, its frequency in Csnβ<sup>Cre</sup> and Defa6<sup>iCre</sup> was limited to ~0,6% and ~0,02%,  
136 respectively (Figure 2c). Interestingly, even though the frequency of TdTOM<sup>+</sup> TECs was  
137 significantly decreased across the Foxn1<sup>Cre</sup>, Csnβ<sup>Cre</sup> and Defa6<sup>iCre</sup> mouse models (Figure 1c),  
138 the ratio between the frequency of TdTOM<sup>+</sup>CD11c<sup>+</sup> and TdTOM<sup>+</sup>CD45<sup>-</sup>EpCAM<sup>+</sup> TECs cells  
139 in the models used was comparable (Figure 2d). These analyses argue for the similarity in CAT  
140 efficiency between donor TECs and CD11c<sup>+</sup> APC acceptors, irrespective of the robustness and  
141 cell-subset range of TdTOM expression in TECs.

142 To study CAT in the mouse models defined above, we determined seven subpopulations of  
143 thymic CD11c<sup>+</sup> cells (Supplementary Figure 2a). These cells are comprised of three major  
144 categories: B220<sup>+</sup> plasmacytoid DCs (pDC), CD11c<sup>Low</sup>MHCII<sup>Low</sup>CX3CR1<sup>+</sup> macrophage-like  
145 population (Mac), and CD11c<sup>+</sup>MHCII<sup>High</sup> cells which represent a conventional type of thymic  
146 DCs. Historically, the thymic DCs were subdivided into two groups, cDC1 and cDC2, defined  
147 by the expression of chemokine receptor, XCR1 and SIRPα, respectively (Li et al., 2009).  
148 Recently, the SIRPα<sup>+</sup> DCs were described to encompass a minimum of two different  
149 subpopulations, defined by the expression of MGL2 (CD301b) and CD14 to MGL2<sup>+</sup>CD14<sup>-</sup>  
150 cDC2 and MGL2<sup>+</sup>CD14<sup>+</sup> monocyte-derived DCs (moDC) (Vobořil et al., 2020). It has also  
151 become evident that DCs could be phenotypically and functionally defined by their activation  
152 status (Ardouin et al., 2016; Park et al., 2020; Vobořil et al., 2020). Hence, two phenotypically  
153 distinct subsets of activated DC (aDCs), CCR7<sup>+</sup>XCR1<sup>+</sup> and CCR7<sup>+</sup>XCR1<sup>-</sup>, can be identified  
154 (Supplementary Figure 2a). A comparative analysis of the capacity of each of these thymic  
155 CD11c<sup>+</sup> APC subsets to acquire TEC-derived TdTOM showed that consistent with previously  
156 published data (Ardouin et al., 2016), XCR1<sup>+</sup> aDCs were the most efficient cells involved in  
157 CAT irrespective of the Cre-based ROSA26<sup>TdTOM</sup> model used. On the other hand, while Macs  
158 and pDCs were relatively inefficient, the remaining subsets varied in this efficiency depending  
159 on the Cre-model analyzed (Supplementary Figure 2b). Using bone marrow (BM) chimeras of  
160 sub-lethally irradiated mouse models (Foxn1<sup>Cre</sup>, Csnβ<sup>Cre</sup> and Defa6<sup>iCre</sup>) reconstituted with

161 congenically marked BM cells isolated from WT animals, we verified that TdTOM is indeed  
162 transferred from TECs to all subpopulations of thymic CD11c<sup>+</sup> APCs and is not endogenously  
163 expressed by these APCs themselves (Supplementary Figure 2c-f).

164 Since the frequency of each CD11c<sup>+</sup> APC subset as well as their capacity to acquire TEC-  
165 derived antigen differ, we next assessed their contribution to CAT in all three Cre-based  
166 ROSA26<sup>TdTOM</sup> mouse models. Due to the comparative nature of this approach (comparing the  
167 efficiency of CAT for each CD11c<sup>+</sup> APC subset in each Cre model), we first performed an  
168 unsupervised flow cytometry analysis of all CD11c<sup>+</sup>TdTOM<sup>+</sup> cells concatenated from 10  
169 independent samples from each of the Cre-based mouse models (30 samples) (Figure 2e).  
170 Based on the markers shown in Supplementary Figure 3a, we identified all phenotypically  
171 distinguished CD11c<sup>+</sup> APC subsets in the resulting tSNE plot (Supplementary Figure 3a-b).  
172 Analyzing each of the Cre-based ROSA26<sup>TdTOM</sup> mouse models individually (Figure 2f), the  
173 data revealed that whereas the contribution of cDC1s and moDCs to CAT is robust in all the  
174 cases studied, the contribution of pDCs, Macs, cDC2s, and both populations of aDC subsets  
175 varied among the models. Notably, cDC2s, pDCs, and Macs were significantly increased in  
176 the Foxn1<sup>Cre</sup> mouse model. In contrast, the frequency of XCR1<sup>+</sup> and XCR1<sup>-</sup> aDCs was the  
177 lowest in Foxn1<sup>Cre</sup>, with an increase detected in Csnβ<sup>Cre</sup>, and the highest frequency detected in  
178 Defa6<sup>iCre</sup> model (Fig. 2g). Taken together, this data shows that the extent of the involvement of  
179 each DC subset in CAT depends on the distribution of TdTOM protein expression among the  
180 different subtypes of TECs, and/or the overall proportion of TECs expressing the TdTOM. In  
181 this way, the assorted expression of TdTOM antigen by a limited but defined subset of TECs  
182 allows the visual identification of those DC subsets which engage these TEC subsets during  
183 CAT.

184

### 185 **Projecting preferential trajectories of CAT between TEC and thymic DC subsets.**

186 To reveal the possible combinations of TEC and DC subsets that are preferentially engaged in  
187 CAT, the frequency of TdTOM<sup>+</sup> TEC subsets shown in Figure 1d-e and TdTOM<sup>+</sup> thymic DC  
188 subsets from Figure 2e-g were visualized as color-coded pie charts for each Cre-based mouse  
189 model used (Figure 3a). Upon inspection of these charts, a trend towards the decrease of  
190 mTEC<sup>Low</sup> versus the increase of mTEC<sup>High</sup> and Pre-post Aire cells from Foxn1<sup>Cre</sup> to Csnβ<sup>Cre</sup> to  
191 Defa6<sup>iCre</sup> mouse models is apparent. On the other hand, a decrease in the frequency of pDCs  
192 and Macs was observed while the contribution of XCR1<sup>+</sup> and XCR1<sup>-</sup> aDCs in the TdTOM<sup>+</sup>  
193 gate was increased. The simplest interpretation of these correlations is the possibility of pDCs

194 and Macs preferentially acquire antigen from mTEC<sup>Low</sup> subset, while the CAT to both  
195 populations of aDCs, is likely associated with mTEC<sup>High</sup> and Pre-post Aire cells (Figure 3a).

196 It was previously described that the composition of TEC subsets differs with the age of mice.  
197 Specifically, the number of Aire<sup>+</sup> mTEC<sup>High</sup> cells has been shown to be decreased, while the  
198 number of Post-Aire mTECs gradually increased with age (Baran-Gale et al., 2020; Bornstein  
199 et al., 2018; Gray et al., 2006). Therefore, we compared the composition of the TEC  
200 subpopulations in TdTOM<sup>+</sup> cells between young (4-6 weeks) and older (11-13 weeks) Csnβ<sup>Cre</sup>  
201 mice to assess whether the changes in TdTOM composition in TECs would affect the frequency  
202 of TdTOM<sup>+</sup> DCs. As expected, the population of TdTOM<sup>+</sup> mTEC<sup>High</sup> decreased, whereas  
203 TdTOM<sup>+</sup> Post-Aire and Pre-post Aire mTECs increased with age (Figure 3b, left plot). Taking  
204 advantage of this phenomenon, we tested our prediction that the frequency of the TdTOM<sup>+</sup> DC  
205 subsets would be altered in older Csnβ<sup>Cre</sup> mice. Indeed, we observed a significant decrease in  
206 the frequency of cDC1s and Macs, along with an increase in XCR1<sup>-</sup> aDC, cDC2, and pDC  
207 subsets (Figure 3b left graph). This data provides further evidence that CAT, as opposed to  
208 being mediated via random interactions, is a tightly regulated process that supports selective  
209 interactions between TEC and DC subsets.

210 To identify the predominant TEC-to-DC subsets trajectories of CAT, we performed a linear  
211 regression analysis of TdTOM<sup>+</sup> TEC and TdTOM<sup>+</sup> DC frequencies across Foxn1<sup>Cre</sup>, Defa6<sup>iCre</sup>,  
212 young Csnβ<sup>Cre</sup>, and older Csnβ<sup>Cre</sup> mice (Figures 1e, 2g, and 3b). The data presented in Figure  
213 3c confirmed the relatively narrow selectivity of each of the thymic DC subsets for certain TEC  
214 subset(s) from which they preferentially acquire antigens. Specifically, CAT to XCR1<sup>+</sup> aDCs  
215 significantly correlated with the expression of TdTOM in mTECs<sup>High</sup>, Pre-post Aire, and Tuft  
216 mTECs, whereas XCR1<sup>-</sup> aDCs aligned mostly with Pre-post Aire mTECs. cDC2s were the  
217 only subset that positively correlated with antigen production in Post-Aire mTECs. pDCs and  
218 Macs, and to a lesser extent cDC2s, correlated with mTEC<sup>Low</sup>. In addition, the Macs population  
219 significantly correlated with the expression of TdTOM in cTECs. This is consistent with the  
220 fact that the thymic Mac subset has been shown to preferentially reside in the thymic cortex  
221 (Breed et al., 2019). It is also important to emphasize that CAT to pDCs, Macs, and to lesser  
222 extend also to cDC2s, is highly affected by the frequency of total TdTOM<sup>+</sup> TECs (Figure 3d).  
223 Thus, if the availability of TEC-derived antigens is limited, pDCs and Macs are outcompeted  
224 in CAT by other DC subsets. Surprisingly, the only positive correlation observed for cDC1  
225 subset was with cTECs (Figure 3c). In this context, it was previously described that cDC1s  
226 predominantly acquired antigen from Aire<sup>+</sup> mTEC<sup>High</sup> subset (Lei et al., 2011; Perry et al.,



227 2018). This discrepancy could be explained by the fact that cDC1s are the most represented  
228 population of TdTOM<sup>+</sup> cells across all described models. Therefore, they show limited  
229 variability in their frequencies among TdTOM<sup>+</sup> cells, which leaves little room for correlation  
230 in linear regression models. Therefore, we also performed a linear regression analysis of  
231 mTEC<sup>High</sup> and cDC1 using only young and older Csnβ<sup>Cre</sup> mice in which the variability in the  
232 frequency of TdTOM<sup>+</sup> cDC1 is higher (Figure 3b). This analysis indicated that cDC1s acquired  
233 antigen preferentially from mTEC<sup>High</sup> cells (Supplementary Figure 4a). Remarkably, moDCs  
234 were the only DC subset that did not positively correlate with any of the TEC subsets (Figure  
235 3c).

236 Together, this data confirms the hypothesis that CAT occurs between subsets of TECs and  
237 thymic DCs in a selective manner, with the exception of moDCs, which failed to reveal a  
238 preference for any subset of TECs.

239

#### 240 **Thymic moDCs are the most efficient subset in repetitive CAT.**

241 Experiments that employed single-fluorescent protein transfer mouse models showed that most  
242 of the thymic CD11c<sup>+</sup> subsets acquired antigens from more than one mTEC subset (Figure 3c).  
243 This poses the question of whether a single DC can take up antigens from several distinct TECs  
244 repetitively. To test this hypothesis, we utilized the Foxn1<sup>Cre</sup>Confetti<sup>Brainbow2.1</sup> mouse model in  
245 which cytosolic RFP and YFP, and membrane CFP are expressed individually or in  
246 combination by TECs. The transfer of these fluorescent proteins to DCs (Figure 4a) was then  
247 measured. The expression of GFP, which should be present in the nucleus of  
248 Foxn1<sup>Cre</sup>Confetti<sup>Brainbow2.1</sup> TECs (Snippert et al., 2010), was recently reported to be abrogated  
249 (Venables et al., 2019). By visualizing TECs from Foxn1<sup>Cre</sup>Confetti<sup>Brainbow2.1</sup> and MHCII<sup>eGFP</sup>  
250 mice, the latter used as a positive control, either separately or as a mixed cell suspension,  
251 confirmed that GFP is indeed absent in TECs from Foxn1<sup>Cre</sup>Confetti<sup>Brainbow2.1</sup> mice  
252 (Supplementary Figure 5a). Given that YFP and RFP/CFP are expressed from mutually  
253 exclusive cassettes in Foxn1<sup>Cre</sup>Confetti<sup>Brainbow2.1</sup> mice (Snippert et al., 2010), those TECs which  
254 express YFP do not express RFP and/or CFP and vice versa (Supplementary Figure 5b-d).  
255 Therefore, those DCs which were positive for both RFP and YFP must have obtained these  
256 antigens from two or more distinct TECs (Figure 4b). We found that this multi-antigen transfer  
257 occurred nearly as frequently as the transfer from a single mTEC and that all CD11c<sup>+</sup> APCs  
258 were involved in repetitive CAT. However, moDCs revealed the highest frequency of

259 RFP<sup>+</sup>YFP<sup>+</sup> cells which suggests a high level of promiscuity in targeting TEC subsets (Figure  
260 4b and Supplementary Figure 5e).

261 The Foxn1<sup>Cre</sup>Confetti<sup>Brainbow2.1</sup> model also showed that the transfer of the CFP membrane  
262 antigen was observed less frequently than that of cytosolic antigens YFP and RFP. CFP transfer  
263 was largely mediated by XCR1<sup>+</sup> aDCs which exhibited more than a 5-fold higher frequency of  
264 CFP positivity than any other CD11c<sup>+</sup> subset (Figure 4c and Supplementary Figure 5f). Among  
265 the CFP<sup>+</sup>CD11c<sup>+</sup> cell subsets, we also analyzed the co-acquisition of the other two fluorescent  
266 proteins (FPs) (Supplementary Figure 5g). As expected and consistent with their strong  
267 capacity to acquire FPs from more than one mTEC, the highest frequency of CFP<sup>+</sup>RFP<sup>+</sup>YFP<sup>+</sup>  
268 cells were found in the moDC subset (Supplementary Figure 5g, right plot). There were only a  
269 few CFP<sup>+</sup>YFP<sup>+</sup> cells observed in the CD11c<sup>+</sup> subsets, which correlates with the overall low  
270 abundance of CFP single positive mTECs (Supplementary Figure 5b) and consequent low  
271 probability of a sequential encounter of YFP<sup>+</sup> and CFP single positive TEC by CD11c<sup>+</sup> cells.  
272 Since XCR1<sup>+</sup> aDCs were, in general, the most potent DC subset in CAT in  
273 Foxn1<sup>Cre</sup>Confetti<sup>Brainbow2.1</sup> mice, we imaged this subset with all possible FP<sup>+</sup> variants using  
274 imaging flow cytometry (Figure 4d). It is of note, that CFP was in direct contrast to other FPs  
275 localized mainly to the plasma membranes of CAT-experienced XCR1<sup>+</sup> aDCs.

276 Taken together, using Foxn1<sup>Cre</sup>Confetti<sup>Brainbow2.1</sup> mice, we demonstrated that a single CD11c<sup>+</sup>  
277 APC frequently acquired antigens from more than one mTEC and that the most potent subset  
278 in this repetitive CAT were moDCs. Moreover, we also showed that XCR1<sup>+</sup> aDCs were very  
279 effective in the acquisition of both cytosolic and membrane-bound antigens.

280

### 281 **Thymic CD11c<sup>+</sup> cells can share their antigens.**

282 Apart from the other CD11c<sup>+</sup> APCs analyzed, the moDC subset showed no specific preference  
283 for any TEC subset in CAT (Figure 3c). This, together with their highest capacity among other  
284 CD11c<sup>+</sup> subsets for repetitive CAT (Figure 4b) led us to test their possible involvement in the  
285 acquisition of antigens from other thymic CD11c<sup>+</sup> cells. We performed a mixed BM chimera  
286 experiment in which irradiated CD45.1<sup>+</sup>CD45.2<sup>+</sup> WT mice were reconstituted with a mix of  
287 BM (50:50) isolated from CD45.1<sup>+</sup> WT and CD45.2<sup>+</sup> CD11c<sup>CRE</sup>Rosa26<sup>TdTom</sup> mice (Figure 5a  
288 and Supplementary Figure 6a). Flow cytometric analysis showed that out of all  
289 CD45.1<sup>+</sup>CD11c<sup>+</sup> cells, approximately 0,75% acquired TdTom from CD45.2<sup>+</sup>CD11c<sup>+</sup> cells  
290 (Figure 5b-c). While the contribution of both aDC subsets and cDC2s to CAT was robust, the  
291 highest frequency of TdTom<sup>+</sup> cells was found among the moDC subset (Figure 5d and

292 Supplementary Figure 6b). Thus, thymic CD11c<sup>+</sup> cells, especially moDCs, acquire antigens  
293 not only from TECs but from other CD11c<sup>+</sup> cells as well.

294 Together, this data demonstrates that the acquisition of antigens by the thymic population of  
295 CD11c<sup>+</sup> cells is not restricted to TEC subsets but is extended to other cell-subtypes, mainly to  
296 their own CD11c<sup>+</sup> cells. Remarkably, among all thymic DCs, moDCs were the most efficient  
297 in this special type of “cannibalistic” CAT.

298

## 299 **Discussion**

300 This study, which has been based on initial observations by others (Lancaster et al., 2019;  
301 Mouri et al., 2017; Perry et al., 2018), confirmed that CAT, i.e. TEC-to-DC antigen-spreading,  
302 is not a random process. Using these studies along with reports concerning the heterogeneity  
303 of thymic APCs as a foundation, we have provided detailed insight into how particular subsets  
304 of TECs and thymic APC are interconnected in the transfer of TEC-produced antigens.  
305 Specifically, utilizing several murine genetic models which allowed the tracking of TEC-  
306 produced antigen, we determined that CAT is mediated predominantly by preferential pairing  
307 between the following TECs and CD11c<sup>+</sup> DC subsets: (i) mTEC<sup>Low</sup> to pDC and Mac, (ii)  
308 mTEC<sup>High</sup> to cDC1 and XCR1<sup>+</sup> aDC, (iii) Pre-post Aire mTEC to XCR1<sup>+</sup> and XCR1<sup>-</sup> aDC, (iv)  
309 Post-Aire mTEC to cDC2, and (v) Tuft mTEC to XCR1<sup>+</sup> aDC. These CAT trajectories, which  
310 are depicted in Figure 6a, argue in favor of a model of preferential pairing in thymic antigen  
311 transfer. However the antigen acquisition by pDCs and Macs is effective only when the antigen  
312 is abundant. In addition, we also report that thymic moDCs, which do not exhibit subset  
313 specificity in CAT, generally obtain antigen from multiple cellular sources of thymic TECs as  
314 well as CD11c<sup>+</sup> DC subsets.

315 In this study, we confirmed a high level of internal TEC heterogeneity which could be divided  
316 into a minimum of six distinct subsets (Baran-Gale et al., 2020; Bautista et al., 2021; Bornstein  
317 et al., 2018; Dhalla et al., 2020; Wells et al., 2020). Since the majority of these subsets are  
318 developmentally related to each other (Bornstein et al., 2018; Metzger et al., 2013; Miller et  
319 al., 2018), our Cre-based ROSA26<sup>TdTOM</sup> mouse models (Figure 1a) can be employed as lineage  
320 tracing systems for tracking developmental relationships between mTEC subsets. It has been  
321 reported that TdTOM expression in the Csnβ<sup>Cre</sup>ROSA26<sup>TdTOM</sup> mouse model is detected in a  
322 small proportion of mTEC<sup>Low</sup>, in most mTEC<sup>High</sup>, Post-Aire mTEC, and Tuft mTEC subsets  
323 (Bornstein et al., 2018). This is consistent with our data (Figure 1d), which suggests that Csnβ

324 is expressed by a specific population of mTEC<sup>Low</sup> progenitors that further differentiate into  
325 mTECs<sup>High</sup> cells and later into their progeny. In contrast, the TdTOM expression in  
326 Defa6<sup>iCre</sup>ROSA26<sup>TdTOM</sup> should be specifically attributed to Aire<sup>+</sup> mTEC<sup>High</sup> subset and their  
327 Post-Aire progeny, since the expression of defensins in the thymus is highly dependent on Aire  
328 (Filipp et al., 2018). Despite that, we see the TdTOM expression also in the small LY6D<sup>-</sup>  
329 population of mTEC<sup>Low</sup> (Figure 1d). Since several distinct subpopulations of Post-Aire mTEC  
330 were detected (Dhalla et al., 2020), we hypothesized that Cre recombination in mTEC<sup>Low</sup>  
331 reflects the presence of LY6D<sup>-</sup> population of Post-Aire cells than Defa6 locus activation in  
332 Aire<sup>-</sup> mTEC<sup>Low</sup> progenitors. Thus, the significant correlation in CAT between mTEC<sup>Low</sup> and  
333 cDC2 subsets could be influenced by this phenomenon, since cDC2s were shown to acquire  
334 the antigen mostly from Post-Aire mTECs (Figure 3c). It is also important to emphasize that  
335 TdTOM<sup>+</sup> Tuft mTECs were enriched in the Defa6<sup>iCre</sup> mouse model compared to Csnβ<sup>Cre</sup>  
336 (Figure 1e). This suggests that thymic Tuft cells are descendants of Aire<sup>+</sup> mTEC<sup>High</sup> subset  
337 (Miller et al., 2018).

338 The development of novel gating strategies has allowed us to reveal the substantial  
339 heterogeneity of thymic DCs which could be divided into phenotypically and functionally  
340 distinct subsets (Li et al., 2009; Park et al., 2020; Vobořil et al., 2020). Our data points to at  
341 least seven subtypes of CD11c<sup>+</sup> cells that are capable of antigen acquisition from different  
342 subsets of TECs. i.e. cDC1, XCR1<sup>+</sup> aDC, XCR1<sup>-</sup> aDC, cDC2, moDC, pDC, and a population  
343 of Macs (Figure 2e and Supplementary Figure 3a-b). Among them, we have phenotypically  
344 defined two novel subsets of thymic aDCs, which are marked by the overexpression of the  
345 chemokine receptor, CCR7. Notably, it has been reported that the expression of CCR7 defines  
346 the population of XCR1<sup>+</sup>CCR7<sup>+</sup> cDC1s which are considered to be the progeny of  
347 XCR1<sup>+</sup>CCR7<sup>-</sup> cDC1s (Ardouin et al., 2016). However, since these CCR7<sup>+</sup> cDC1s express  
348 several molecules that are not only associated with the cDC1 signature, such as *Batf3*, *Cd8a*,  
349 *Ly75*, or *Cadm1* (Vobořil et al., 2020) but also molecules that have been attributed to the  
350 population of aDCs (*Il12b*, *Il15*, *Il15ra*, *Cd274*, *Cd70*, *Cd40*, *Tnfrsf4*) (Ardouin et al., 2016;  
351 Park et al., 2020) we defined and renamed this subset as XCR1<sup>+</sup> aDC. Remarkably, these cells  
352 are the most efficient DC subset in CAT, even when compared to cDC1s (Supplementary  
353 Figure 2b, Figure 4b) (Ardouin et al., 2016). It was recently suggested that the differentiation  
354 of XCR1<sup>+</sup> aDCs from cDC1s is driven by the uptake of apoptotic cells (Maier et al., 2020).  
355 Since CAT has been shown to be mediated mostly by the endocytosis of apoptotic bodies  
356 (Koble & Kyewski, 2009; Perry et al., 2018), the differentiation of XCR1<sup>+</sup> aDCs in the thymus

357 is consistent with being driven by CAT. Thus, the grounds for the correlation between  
358 mTEC<sup>High</sup> and XCR1<sup>+</sup> aDCs in TdTOM antigen transfer could be found in the fact that  
359 mTEC<sup>High</sup> transfer antigen to XCR1<sup>+</sup> cDC1 which further differentiate into XCR1<sup>+</sup> aDC cells  
360 (Ardouin et al., 2016; Maier et al., 2020). In this context, it is also important to emphasize that  
361 the transcriptional signature of XCR1<sup>-</sup> aDCs is more similar to cDC2 (e.g. *Sirpa* and *Pdcd11g2*)  
362 than cDC1 subset (Park et al., 2020). By the same token, this suggests that antigen transfer into  
363 cDC2s induces their differentiation into XCR1<sup>-</sup> aDCs.

364 Using linear regression analysis of TdTOM<sup>+</sup> TECs and DCs frequencies from all three mouse  
365 models, we identified two subsets of CD11c<sup>+</sup> cells, cDC1 and moDC, that exhibited limited or  
366 no correlation with TEC subsets in TdTOM transfer. cDC1s were observed to correlate with  
367 cTECs (Figure 3c). This is contradictory to previously published data which described the  
368 antigen uptake by cDC1s specifically from Aire<sup>+</sup> mTEC<sup>High</sup> (Lei et al., 2011; Perry et al., 2018).  
369 The data shown in Supplementary Figure 4a supports this conclusion. As briefly stated in the  
370 results section, we view the correlation in CAT between cDC1 and cTEC subsets as an artifact  
371 of the linear regression model because of the variability in TdTOM<sup>+</sup> frequencies of these two  
372 subsets across all Cre-based ROSA26<sup>TdTOM</sup> models remained, for the most part, unchanged  
373 (Figure 3a). We also based this conclusion on the fact that cDC1s are preferentially localized  
374 to the thymic medulla, whereas cTECs take up residence in the thymic cortex, a condition  
375 which is not conducive for cell interaction (Klein et al., 2014). Additionally, since CAT has  
376 been shown to be cell contact-dependent (Kroger et al., 2017; Perry et al., 2018) and XCL1-  
377 XCR1 chemotactic axis is essential for CAT between Aire<sup>+</sup> mTEC<sup>High</sup> and cDC1 subsets (Lei  
378 et al., 2011), we favor the scenario that cDC1s acquire antigen preferentially from mTEC<sup>High</sup>  
379 subset and not cTECs (Figure 6a).

380 The second subset of thymic CD11c<sup>+</sup> cells, which failed to show a correlation with any TEC-  
381 subset in CAT consisted of the moDCs. Interestingly, while moDCs are very potent in CAT  
382 (Figure 2e and Supplementary Figure 2b), their capacity can be further enhanced under  
383 inflammatory conditions (Vobořil et al., 2020). We demonstrated that among other thymic  
384 DCs, moDC subset were the most efficient in repetitive CAT (Figure 4b and Supplementary  
385 Figure 5g). This, along with their ability to efficiently acquire antigen from other CD11c<sup>+</sup>  
386 APCs (Figure 5d), is a testament to their important function in central tolerance (Park et al.,  
387 2020; Vobořil et al., 2020). Since thymic moDCs were shown to express a plethora of different  
388 chemokines and scavenger receptors (Park et al., 2020; Vobořil et al., 2020), we propose that

389 these characteristics correlate with their high competence in regulated migration and  
390 phagocytic activity compared to other DC subsets (Croxford et al., 2015).

391 In conclusion, using novel gating strategies for the identification of multiple TEC subsets  
392 which produce TdTOM antigen and tracking of its transfer into phenotypically defined thymic  
393 CD11c<sup>+</sup> APC subsets has allowed us to define preferential antigen trajectories which mediate  
394 CAT. Our data shows that XCR1<sup>+</sup> aDCs are the most potent subset in the acquisition of TEC-  
395 derived antigens. It also characterizes the moDC subset as the most efficient in the acquisition  
396 of antigen from multiple TECs as well as DCs. Taken together, our work proposes that CAT  
397 relies on a cellular interaction network with preferential partnerships between defined subtypes  
398 of TECs and DCs. This, in turn, suggests that the indirect presentation of antigens from  
399 developmentally related but phenotypically and functionally distinct types of TECs is ascribed  
400 to different subsets of thymic DCs. However, how these cell-to-cell preferential interactions  
401 which are the underlying characteristics of CAT facilitate the processes of central tolerance,  
402 such as the deletion of self-reactive clones of T-cells or their conversion to Tregs awaits its  
403 resolution. Although this study suggests that CAT is a deterministic process, the molecules and  
404 mechanisms that determine TEC-to-DC cell-cell interactions remain to be identified.

405

## 406 **Materials and Methods**

### 407 **Mice**

408 All mouse models used in this study were of C57BL/6J genetic background and housed under  
409 SPF conditions at the animal facility of the Institute of Molecular Genetics (IMG) in Prague.  
410 All animal experiments were approved by the ethical committee of the IMG and the Czech  
411 Academy of Sciences. C57BL/6J, Foxn1<sup>Cre</sup> (B6(Cg)-Foxn1<sup>tm3(cre)Nrm</sup>/J) (Gordon et al., 2007),  
412 Ly5.1 (B6.SJL-Ptprc<sup>a</sup> Pepc<sup>b</sup>/BoyJ) (Janowska-Wieczorek et al., 2001), and CD11c<sup>Cre</sup> (B6.Cg-  
413 Tg(Itgax-cre)1-1Reiz/J) (Caton et al., 2007) mice were purchased from Jackson Laboratories.  
414 Csnβ<sup>Cre</sup> mice (Bornstein et al., 2018) were kindly provided by J. Abramson (Department of  
415 Immunology, Weizmann Institute of Science, Rehovot, Israel). Defa6<sup>iCre</sup> mice (Adolph et al.,  
416 2013) were kindly provided by R. S. Blumberg (Division of Gastroenterology, Department of  
417 Medicine, Brigham and Women's Hospital, Harvard Medical School, Boston, Massachusetts).  
418 Rosa26<sup>TdTOMATO</sup> mice (B6;129S6-Gt(ROSA)26Sor<sup>tm14(CAG-tdTomato)Hze</sup>/J) (Madisen et al., 2010)  
419 were provided by V. Kořínek (IMG, Prague, Czech Republic). Confetti<sup>Brainbow2.1</sup>  
420 (Gt(ROSA)26Sor<sup>tm1(CAG-Brainbow2.1)Cle</sup>/J) (Snippert et al., 2010) mice were provided by the Czech

421 Center for Phenogenomics (IMG, Vestec, Czech Republic). MHCII<sup>eGFP</sup> mice (Boes et al.,  
422 2002) were provided by J. Černý (Department of Cell Biology, Faculty of Science, Charles  
423 University, Prague). All mice were fed an Altromin 1314 IRR diet. Reverse osmosis filtered  
424 and chlorinated water was available to the animals ad libitum. All mice were bred in an  
425 environment in which the temperature and humidity of  $22 \pm 1^\circ\text{C}$  and  $55 \pm 5\%$ , respectively  
426 was constant and under a 12 h oscillating light/dark cycle. Prior to tissue isolation, mice were  
427 euthanized by cervical dislocation.

#### 428 **Tissue preparation and cell isolation**

429 Thymic tissue was extracted using forceps, cut into small pieces, and enzymatically digested  
430 with  $0.1 \text{ mg} \cdot \text{ml}^{-1}$  Dispase II (Gibco) dissolved in RPMI. Pieces of thymic tissue were pipetted  
431 up and down several times using a pipet tip that had been cut and incubated in a shaker at 800  
432 rpm for 10 min at  $37^\circ\text{C}$ . This procedure was repeated ~5 times to completely dissolve the tissue.  
433 The supernatant was collected and the enzymatic reaction was stopped by adding 3% FCS and  
434 2 mM EDTA. To isolate thymic epithelial cells (TECs), isolated cells were MACS-depleted of  
435 CD45<sup>+</sup> cells using CD45 microbeads (Miltenyi). After depletion, the suspension was spun  
436 down ( $4^\circ\text{C}$ , 300 g, 10 min) and the resulting pellet was resuspended in ACK lysis buffer for 2  
437 min to deplete erythrocytes. To isolate thymic DCs and macrophages, MACS enrichment for  
438 CD11c<sup>+</sup> cells was performed using CD11c biotin-conjugated antibody (eBioscience) and  
439 Ultrapure Anti-Biotin microbeads (Miltenyi).

#### 440 **Flow cytometry analysis and cell sorting**

441 Cell staining for flow cytometry (FACS) analysis and sorting was performed at  $4^\circ\text{C}$ , in the  
442 dark, for 20–30 min, with the exception of anti-CCR7 antibody (Biolegend) staining which  
443 required incubation at  $37^\circ\text{C}$  for a minimum of 30 min. To exclude dead cells, either Hoechst  
444 33258 (Sigma-Aldrich) or viability dye eFluor 506 (eBioscience) was used. FACS analysis of  
445 TECs and DCs was performed using BD<sup>TM</sup> LSR II and BD<sup>TM</sup> FACSymphony A5 cytometers,  
446 respectively. A BD<sup>TM</sup> FACSAria IIu sorter was used for cell sorting. BD FACSDiva<sup>TM</sup>  
447 Software and FlowJO V10 software (Treestar) were used for FACS data analysis. For the  
448 purpose of tSNE analysis, the same amount of CD11c<sup>+</sup> TdTOM<sup>+</sup> cells from each model was  
449 concatenated by using the FlowJO concatenate function. The final tSNE was calculated by  
450 FlowJO opt-SNE plugin. The entire list of FACS staining reagents is provided in  
451 Supplementary Table 1.

## 452 **Imaging flow cytometry**

453 Imaging flow cytometry (Imagestream) was performed using AMNIS ImageStream X MkII at  
454 the Center for Preclinical Imaging (CAPI) in Prague. Imaged XCR1<sup>+</sup> aDC were isolated from  
455 Foxn1<sup>Cre</sup>Confetti<sup>Brainbow2.1</sup> mice, stained for their CD11c, XCR1, and CCR7 markers, and sorted  
456 as RFP<sup>+</sup> and/or YFP<sup>+</sup> and/or CFP<sup>+</sup>. The data was acquired via Imagestream with 40x  
457 magnification. Ideas 6.1 software (AMNIS) was used for data analysis.

## 458 **Confocal and spinning disk microscopy**

459 To test GFP expression in TECs from Foxn1<sup>Cre</sup>Confetti<sup>Brainbow2.1</sup> mice (Supplementary Fig. 5a),  
460 thymic cells from Foxn1<sup>Cre</sup>Confetti<sup>Brainbow2.1</sup> and MHCII<sup>eGFP</sup> mice were MACS-depleted of  
461 CD45<sup>+</sup> fraction and imaged on a Leica TCS SP5 AOBS Tandem confocal microscope using  
462 the HCX PL APO 10x/0.40 DRY CS; FWD 2.2; CG 0.17 | BF, POL objective. To visualize  
463 TEC fluorescent variants from Foxn1<sup>Cre</sup>Confetti<sup>Brainbow2.1</sup> mice (Supplementary Fig. 5d),  
464 CD45<sup>+</sup>EpCAM<sup>+</sup> TECs were sorted as RFP<sup>+</sup> and/or YFP<sup>+</sup> and/or CFP<sup>+</sup> and visualized with a  
465 Andor Dragonfly 503 spinning disk confocal microscope using HCX PL APO 63x/1.40-0.6  
466 OIL  $\lambda$ B; FWD 0.12; CG 0.17 | BF, POL, DIC objective.

## 467 **Bone marrow chimeras**

468 Bone marrow was flushed out from the femur and tibia of Ly5.1 (CD45.1<sup>+</sup>; Fig. 5,  
469 Supplementary Fig. 2d, e, f and 6) or CD11c<sup>CRE</sup>Rosa26<sup>TdTOMATO</sup> (CD45.2<sup>+</sup>; Fig. 5 and  
470 Supplementary Fig. 6) mice using a syringe with 26g needle. Isolated cells were depleted of  
471 erythrocytes with ACK lysis buffer. Recipient mice were sublethally irradiated with 6 Gy and  
472 reconstituted with  $2 \times 10^6$  Ly5.1 BM cells in the case of  
473 Foxn1<sup>Cre</sup>/Csn $\beta$ <sup>Cre</sup>/Defa6<sup>iCre</sup>ROSA26<sup>TdTOMATO</sup> mice (Supplementary Fig. 2d, e, f) or with  $2 \times$   
474  $10^6$ , 50:50 mixed Ly5.1:CD11c<sup>CRE</sup>Rosa26<sup>TdTOMATO</sup> BM cells in the case of C57BL/6J Ly5.1  
475 mice (CD45.1<sup>+</sup>CD45.2<sup>+</sup>; Fig. 5 and Supplementary Fig. 6). Three weeks after irradiation, the  
476 BM reconstitution was verified by the staining of blood with anti-CD45.1 and CD45.2  
477 antibodies. Mice were subjected to further analysis 6 weeks after irradiation if the BM  
478 reconstitution exceeded 80% (Supplementary Fig. 2d, e, f) or was between 40–60% within both  
479 CD45.1<sup>+</sup> and CD45.2<sup>+</sup> cell compartments (Fig. 5 and Supplementary Fig. 6).

## 480 **Statistical analysis**



481 Statistical analysis and graph layouts were performed using Prism 5.04 software (GraphPad).  
482 Linear regressions were calculated using R 3.6.2. (R core team 2019). The statistical tests used  
483 for data analysis are indicated in figure legends.

## 484 **Acknowledgments**

485 We would like to thank the members of the flow cytometry facility, Z. Cimburek, and M. Šíma,  
486 from IMG in Prague for technical support and I. Novotný for assistance with microscopic  
487 experiments. We also thank M. Bájecný for technical assistance with Imaging flow cytometry.  
488 We are indebted to J. Abramson for providing the  $Csn\beta^{Cre}$  mice, V. Kořínek for  
489 ROSA26<sup>TdTOMATO</sup> mice, and the Czech Center for Phenogenomics for Confetti<sup>Brainbow2.1</sup> mice.  
490 This work was supported by Grant 20-30350S from GACR. J.B. was supported by Grant  
491 836119 from the Charles University Grant Agency (GA UK). J.D. was supported by a PRIMUS  
492 grant (Primus/21/MED/003) from Charles University and a Czech Science Foundation  
493 JUNIOR STAR grant (GAČR 21-22435M). T.B. was partially supported by Grant RVO:  
494 68378050-KAV-NPUI.

## 495 **Author contributions**

496 M.V. and J.B. co-designed and conducted the majority of the experiments and wrote the  
497 manuscript. T.B. performed some of the experiments and provided technical and intellectual  
498 help. J.D. conducted Imaging flow cytometry experiment and helped with the preparation of  
499 the manuscript. O.B. performed microscopic experiments and M.D. and J.M. provided  
500 technical support for the work and manuscript editing. R.B. provided Defa6<sup>iCre</sup> mice. D.F. co-  
501 designed experiments, supervised research and edited the manuscript.

502

## 503 **References**

504 Adolph, T. E., Tomczak, M. F., Niederreiter, L., Ko, H. J., Böck, J., Martinez-Naves, E.,  
505 Glickman, J. N., Tschurtschenthaler, M., Hartwig, J., Hosomi, S., Flak, M. B., Cusick,  
506 J. L., Kohno, K., Iwawaki, T., Billmann-Born, S., Raine, T., Bharti, R., Lucius, R.,  
507 Kweon, M. N., Marciniak, S. J., Choi, A., Hagen, S. J., Schreiber, S., Rosenstiel, P.,  
508 Kaser, A., & Blumberg, R. S. (2013). Paneth cells as a site of origin for intestinal  
509 inflammation. *Nature*, 503(7475), 272-276. <https://doi.org/10.1038/nature12599>  
510 Ardouin, L., Luche, H., Chelbi, R., Carpentier, S., Shawket, A., Montanana Sanchis, F., Santa  
511 Maria, C., Grenot, P., Alexandre, Y., Grégoire, C., Fries, A., Vu Manh, T. P.,  
512 Tamoutounour, S., Crozat, K., Tomasello, E., Jorquera, A., Fossum, E., Bogen, B.,  
513 Azukizawa, H., Bajenoff, M., Henri, S., Dalod, M., & Malissen, B. (2016). Broad and

- 514 Largely Concordant Molecular Changes Characterize Tolerogenic and Immunogenic  
515 Dendritic Cell Maturation in Thymus and Periphery. *Immunity*, 45(2), 305-318.  
516 <https://doi.org/10.1016/j.immuni.2016.07.019>
- 517 Baran-Gale, J., Morgan, M. D., Maio, S., Dhalla, F., Calvo-Asensio, I., Deadman, M. E.,  
518 Handel, A. E., Maynard, A., Chen, S., Green, F., Sit, R. V., Neff, N. F., Darmanis, S.,  
519 Tan, W., May, A. P., Marioni, J. C., Ponting, C. P., & Holländer, G. A. (2020). Ageing  
520 compromises mouse thymus function and remodels epithelial cell differentiation. *Elife*,  
521 9. <https://doi.org/10.7554/eLife.56221>
- 522 Bautista, J. L., Cramer, N. T., Miller, C. N., Chavez, J., Berrios, D. I., Byrnes, L. E., Germino,  
523 J., Ntranos, V., Sneddon, J. B., Burt, T. D., Gardner, J. M., Ye, C. J., Anderson, M. S.,  
524 & Parent, A. V. (2021). Single-cell transcriptional profiling of human thymic stroma  
525 uncovers novel cellular heterogeneity in the thymic medulla. *Nat Commun*, 12(1), 1096.  
526 <https://doi.org/10.1038/s41467-021-21346-6>
- 527 Boes, M., Cerny, J., Massol, R., Op den Brouw, M., Kirchhausen, T., Chen, J., & Ploegh, H.  
528 L. (2002). T-cell engagement of dendritic cells rapidly rearranges MHC class II  
529 transport. *Nature*, 418(6901), 983-988. <https://doi.org/10.1038/nature01004>
- 530 Bornstein, C., Nevo, S., Giladi, A., Kadouri, N., Pouzolles, M., Gerbe, F., David, E., Machado,  
531 A., Chuprin, A., Tóth, B., Goldberg, O., Itzkovitz, S., Taylor, N., Jay, P., Zimmermann,  
532 V. S., Abramson, J., & Amit, I. (2018). Single-cell mapping of the thymic stroma  
533 identifies IL-25-producing tuft epithelial cells. *Nature*, 559(7715), 622-626.  
534 <https://doi.org/10.1038/s41586-018-0346-1>
- 535 Breed, E. R., Watanabe, M., & Hogquist, K. A. (2019). Measuring Thymic Clonal Deletion at  
536 the Population Level. *J Immunol*, 202(11), 3226-3233.  
537 <https://doi.org/10.4049/jimmunol.1900191>
- 538 Brennecke, P., Reyes, A., Pinto, S., Rattay, K., Nguyen, M., Küchler, R., Huber, W., Kyewski,  
539 B., & Steinmetz, L. M. (2015). Single-cell transcriptome analysis reveals coordinated  
540 ectopic gene-expression patterns in medullary thymic epithelial cells. *Nat Immunol*,  
541 16(9), 933-941. <https://doi.org/10.1038/ni.3246>
- 542 Caton, M. L., Smith-Raska, M. R., & Reizis, B. (2007). Notch-RBP-J signaling controls the  
543 homeostasis of CD8- dendritic cells in the spleen. *J Exp Med*, 204(7), 1653-1664.  
544 <https://doi.org/10.1084/jem.20062648>
- 545 Croxford, A. L., Lanzinger, M., Hartmann, F. J., Schreiner, B., Mair, F., Pelczar, P., Clausen,  
546 B. E., Jung, S., Greter, M., & Becher, B. (2015). The Cytokine GM-CSF Drives the  
547 Inflammatory Signature of CCR2+ Monocytes and Licenses Autoimmunity. *Immunity*,  
548 43(3), 502-514. <https://doi.org/10.1016/j.immuni.2015.08.010>
- 549 Derbinski, J., Pinto, S., Rösch, S., Hexel, K., & Kyewski, B. (2008). Promiscuous gene  
550 expression patterns in single medullary thymic epithelial cells argue for a stochastic  
551 mechanism. *Proc Natl Acad Sci U S A*, 105(2), 657-662.  
552 <https://doi.org/10.1073/pnas.0707486105>
- 553 Derbinski, J., Schulte, A., Kyewski, B., & Klein, L. (2001). Promiscuous gene expression in  
554 medullary thymic epithelial cells mirrors the peripheral self. *Nat Immunol*, 2(11), 1032-  
555 1039. <https://doi.org/10.1038/ni723>
- 556 Dhalla, F., Baran-Gale, J., Maio, S., Chappell, L., Holländer, G. A., & Ponting, C. P. (2020).  
557 Biologically indeterminate yet ordered promiscuous gene expression in single  
558 medullary thymic epithelial cells. *EMBO J*, 39(1), e101828.  
559 <https://doi.org/10.15252/embj.2019101828>
- 560 Dobeš, J., Neuwirth, A., Dobešová, M., Vobořil, M., Balounová, J., Ballek, O., Lebl, J.,  
561 Meloni, A., Krohn, K., Kluger, N., Ranki, A., & Filipp, D. (2015). Gastrointestinal  
562 Autoimmunity Associated With Loss of Central Tolerance to Enteric  $\alpha$ -Defensins.  
563 *Gastroenterology*. <https://doi.org/10.1053/j.gastro.2015.05.009>

- 564 Filipp, D., Brabec, T., Vobořil, M., & Dobeš, J. (2018). Enteric  $\alpha$ -defensins on the verge of  
565 intestinal immune tolerance and inflammation. *Semin Cell Dev Biol.*  
566 <https://doi.org/10.1016/j.semcdb.2018.01.007>
- 567 Gallegos, A. M., & Bevan, M. J. (2004). Central tolerance to tissue-specific antigens mediated  
568 by direct and indirect antigen presentation. *J Exp Med*, 200(8), 1039-1049.  
569 <https://doi.org/10.1084/jem.20041457>
- 570 Gardner, J. M., Devoss, J. J., Friedman, R. S., Wong, D. J., Tan, Y. X., Zhou, X., Johannes, K.  
571 P., Su, M. A., Chang, H. Y., Krummel, M. F., & Anderson, M. S. (2008). Deletional  
572 tolerance mediated by extrathymic Aire-expressing cells. *Science*, 321(5890), 843-847.  
573 <https://doi.org/321/5890/843> [pii]
- 574 10.1126/science.1159407
- 575 Gordon, J., Xiao, S., Hughes, B., Su, D. M., Navarre, S. P., Condie, B. G., & Manley, N. R.  
576 (2007). Specific expression of lacZ and cre recombinase in fetal thymic epithelial cells  
577 by multiplex gene targeting at the Foxn1 locus. *BMC Dev Biol*, 7, 69.  
578 <https://doi.org/10.1186/1471-213X-7-69>
- 579 Gray, D. H., Seach, N., Ueno, T., Milton, M. K., Liston, A., Lew, A. M., Goodnow, C. C., &  
580 Boyd, R. L. (2006). Developmental kinetics, turnover, and stimulatory capacity of  
581 thymic epithelial cells. *Blood*, 108(12), 3777-3785. [https://doi.org/10.1182/blood-](https://doi.org/10.1182/blood-2006-02-004531)  
582 [2006-02-004531](https://doi.org/10.1182/blood-2006-02-004531)
- 583 Guilliams, M., Ginhoux, F., Jakubzick, C., Naik, S. H., Onai, N., Schraml, B. U., Segura, E.,  
584 Tussiwand, R., & Yona, S. (2014). Dendritic cells, monocytes and macrophages: a  
585 unified nomenclature based on ontogeny. *Nat Rev Immunol*, 14(8), 571-578.  
586 <https://doi.org/10.1038/nri3712>
- 587 Janowska-Wieczorek, A., Majka, M., Kijowski, J., Baj-Krzyworzeka, M., Reza, R., Turner, A.  
588 R., Ratajczak, J., Emerson, S. G., Kowalska, M. A., & Ratajczak, M. Z. (2001). Platelet-  
589 derived microparticles bind to hematopoietic stem/progenitor cells and enhance their  
590 engraftment. *Blood*, 98(10), 3143-3149. <https://doi.org/10.1182/blood.v98.10.3143>
- 591 Kadouri, N., Nevo, S., Goldfarb, Y., & Abramson, J. (2020). Thymic epithelial cell  
592 heterogeneity: TEC by TEC. *Nat Rev Immunol*, 20(4), 239-253.  
593 <https://doi.org/10.1038/s41577-019-0238-0>
- 594 Klein, L., Kyewski, B., Allen, P. M., & Hogquist, K. A. (2014). Positive and negative selection  
595 of the T cell repertoire: what thymocytes see (and don't see). *Nat Rev Immunol*, 14(6),  
596 377-391. <https://doi.org/10.1038/nri3667>
- 597 Klein, L., Robey, E. A., & Hsieh, C. S. (2019). Central CD4. *Nat Rev Immunol*, 19(1), 7-18.  
598 <https://doi.org/10.1038/s41577-018-0083-6>
- 599 Koble, C., & Kyewski, B. (2009). The thymic medulla: a unique microenvironment for  
600 intercellular self-antigen transfer. *J Exp Med*, 206(7), 1505-1513.  
601 <https://doi.org/10.1084/jem.20082449>
- 602 Kroger, C. J., Spidale, N. A., Wang, B., & Tisch, R. (2017). Thymic Dendritic Cell Subsets  
603 Display Distinct Efficiencies and Mechanisms of Intercellular MHC Transfer. *J*  
604 *Immunol*, 198(1), 249-256. <https://doi.org/10.4049/jimmunol.1601516>
- 605 Lancaster, J. N., Thyagarajan, H. M., Srinivasan, J., Li, Y., Hu, Z., & Ehrlich, L. I. R. (2019).  
606 Live-cell imaging reveals the relative contributions of antigen-presenting cell subsets  
607 to thymic central tolerance. *Nat Commun*, 10(1), 2220. [https://doi.org/10.1038/s41467-](https://doi.org/10.1038/s41467-019-09727-4)  
608 [019-09727-4](https://doi.org/10.1038/s41467-019-09727-4)
- 609 Lei, Y., Ripen, A. M., Ishimaru, N., Ohigashi, I., Nagasawa, T., Jeker, L. T., Bosl, M. R.,  
610 Hollander, G. A., Hayashi, Y., Malefyt Rde, W., Nitta, T., & Takahama, Y. (2011).  
611 Aire-dependent production of XCL1 mediates medullary accumulation of thymic

- 612 dendritic cells and contributes to regulatory T cell development. *J Exp Med*, 208(2),  
613 383-394. <https://doi.org/10.1084/jem.20102327>
- 614 Li, J., Park, J., Foss, D., & Goldschneider, I. (2009). Thymus-homing peripheral dendritic cells  
615 constitute two of the three major subsets of dendritic cells in the steady-state thymus. *J*  
616 *Exp Med*, 206(3), 607-622. <https://doi.org/10.1084/jem.20082232>
- 617 Madisen, L., Zwingman, T. A., Sunkin, S. M., Oh, S. W., Zariwala, H. A., Gu, H., Ng, L. L.,  
618 Palmiter, R. D., Hawrylycz, M. J., Jones, A. R., Lein, E. S., & Zeng, H. (2010). A robust  
619 and high-throughput Cre reporting and characterization system for the whole mouse  
620 brain. *Nat Neurosci*, 13(1), 133-140. <https://doi.org/10.1038/nn.2467>
- 621 Maier, B., Leader, A. M., Chen, S. T., Tung, N., Chang, C., LeBerichel, J., Chudnovskiy, A.,  
622 Maskey, S., Walker, L., Finnigan, J. P., Kirkling, M. E., Reizis, B., Ghosh, S., D'Amore,  
623 N. R., Bhardwaj, N., Rothlin, C. V., Wolf, A., Flores, R., Marron, T., Rahman, A. H.,  
624 Kenigsberg, E., Brown, B. D., & Merad, M. (2020). A conserved dendritic-cell  
625 regulatory program limits antitumour immunity. *Nature*, 580(7802), 257-262.  
626 <https://doi.org/10.1038/s41586-020-2134-y>
- 627 Meredith, M., Zemmour, D., Mathis, D., & Benoist, C. (2015). Aire controls gene expression  
628 in the thymic epithelium with ordered stochasticity. *Nat Immunol*, 16(9), 942-949.  
629 <https://doi.org/10.1038/ni.3247>
- 630 Metzger, T. C., Khan, I. S., Gardner, J. M., Mouchess, M. L., Johannes, K. P., Krawisz, A. K.,  
631 Skrzypczynska, K. M., & Anderson, M. S. (2013). Lineage tracing and cell ablation  
632 identify a post-Aire-expressing thymic epithelial cell population. *Cell Rep*, 5(1), 166-  
633 179. <https://doi.org/10.1016/j.celrep.2013.08.038>
- 634 Miller, C. N., Proekt, I., von Moltke, J., Wells, K. L., Rajpurkar, A. R., Wang, H., Rattay, K.,  
635 Khan, I. S., Metzger, T. C., Pollack, J. L., Fries, A. C., Lwin, W. W., Wigton, E. J.,  
636 Parent, A. V., Kyewski, B., Erle, D. J., Hogquist, K. A., Steinmetz, L. M., Locksley, R.  
637 M., & Anderson, M. S. (2018). Thymic tuft cells promote an IL-4-enriched medulla  
638 and shape thymocyte development. *Nature*, 559(7715), 627-631.  
639 <https://doi.org/10.1038/s41586-018-0345-2>
- 640 Mouri, Y., Ueda, Y., Yamano, T., Matsumoto, M., Tsuneyama, K., & Kinashi, T. (2017). Mode  
641 of Tolerance Induction and Requirement for Aire Are Governed by the Cell Types That  
642 Express Self-Antigen and Those That Present Antigen. *J Immunol*, 199(12), 3959-3971.  
643 <https://doi.org/10.4049/jimmunol.1700892>
- 644 Park, J. E., Botting, R. A., Domínguez Conde, C., Popescu, D. M., Lavaert, M., Kunz, D. J.,  
645 Goh, I., Stephenson, E., Ragazzini, R., Tuck, E., Wilbrey-Clark, A., Roberts, K.,  
646 Kedlian, V. R., Ferdinand, J. R., He, X., Webb, S., Maunder, D., Vandamme, N.,  
647 Mahbubani, K. T., Polanski, K., Mamanova, L., Bolt, L., Crossland, D., de Rita, F.,  
648 Fuller, A., Filby, A., Reynolds, G., Dixon, D., Saeb-Parsy, K., Lisgo, S., Henderson,  
649 D., Vento-Tormo, R., Bayraktar, O. A., Barker, R. A., Meyer, K. B., Saeys, Y.,  
650 Bonfanti, P., Behjati, S., Clatworthy, M. R., Taghon, T., Haniffa, M., & Teichmann, S.  
651 A. (2020). A cell atlas of human thymic development defines T cell repertoire  
652 formation. *Science*, 367(6480). <https://doi.org/10.1126/science.aay3224>
- 653 Perry, J. S. A., Lio, C. J., Kau, A. L., Nutsch, K., Yang, Z., Gordon, J. I., Murphy, K. M., &  
654 Hsieh, C. S. (2014). Distinct contributions of Aire and antigen-presenting-cell subsets  
655 to the generation of self-tolerance in the thymus. *Immunity*, 41(3), 414-426.  
656 <https://doi.org/10.1016/j.immuni.2014.08.007>
- 657 Perry, J. S. A., Russler-Germain, E. V., Zhou, Y. W., Purtha, W., Cooper, M. L., Choi, J.,  
658 Schroeder, M. A., Salazar, V., Egawa, T., Lee, B. C., Abumrad, N. A., Kim, B. S.,  
659 Anderson, M. S., DiPersio, J. F., & Hsieh, C. S. (2018). Transfer of Cell-Surface  
660 Antigens by Scavenger Receptor CD36 Promotes Thymic Regulatory T Cell Receptor

- 661           Repertoire Development and Allo-tolerance. *Immunity*, 48(6), 1271.  
662           <https://doi.org/10.1016/j.immuni.2018.05.011>
- 663 Sansom, S. N., Shikama-Dorn, N., Zhanybekova, S., Nusspaumer, G., Macaulay, I. C.,  
664 Deadman, M. E., Heger, A., Ponting, C. P., & Holländer, G. A. (2014). Population and  
665 single-cell genomics reveal the Aire dependency, relief from Polycomb silencing, and  
666 distribution of self-antigen expression in thymic epithelia. *Genome Res*, 24(12), 1918-  
667 1931. <https://doi.org/10.1101/gr.171645.113>
- 668 Snippert, H. J., van der Flier, L. G., Sato, T., van Es, J. H., van den Born, M., Kroon-Veenboer,  
669 C., Barker, N., Klein, A. M., van Rheenen, J., Simons, B. D., & Clevers, H. (2010).  
670 Intestinal crypt homeostasis results from neutral competition between symmetrically  
671 dividing Lgr5 stem cells. *Cell*, 143(1), 134-144.  
672           <https://doi.org/10.1016/j.cell.2010.09.016>
- 673 Tykocinski, L. O., Sinemus, A., Rezavandy, E., Weiland, Y., Baddeley, D., Cremer, C.,  
674 Sonntag, S., Willecke, K., Derbinski, J., & Kyewski, B. (2010). Epigenetic regulation  
675 of promiscuous gene expression in thymic medullary epithelial cells. *Proc Natl Acad Sci U S A*, 107(45), 19426-19431. <https://doi.org/10.1073/pnas.1009265107>
- 676 Venables, T., Griffith, A. V., DeAraujo, A., & Petrie, H. T. (2019). Dynamic changes in  
677 epithelial cell morphology control thymic organ size during atrophy and regeneration.  
678 *Nat Commun*, 10(1), 4402. <https://doi.org/10.1038/s41467-019-11879-2>
- 679 Vobořil, M., Brabec, T., Dobeš, J., Šplíchalová, I., Březina, J., Čepková, A., Dobešová, M.,  
680 Aidarova, A., Kubovčíak, J., Tsyklauri, O., Štěpánek, O., Beneš, V., Sedláček, R.,  
681 Klein, L., Kolář, M., & Filipp, D. (2020). Toll-like receptor signaling in thymic  
682 epithelium controls monocyte-derived dendritic cell recruitment and Treg generation.  
683 *Nat Commun*, 11(1), 2361. <https://doi.org/10.1038/s41467-020-16081-3>
- 684 Wells, K. L., Miller, C. N., Gschwind, A. R., Wei, W., Phipps, J. D., Anderson, M. S., &  
685 Steinmetz, L. M. (2020). Combined transient ablation and single-cell RNA-sequencing  
686 reveals the development of medullary thymic epithelial cells. *Elife*, 9.  
687           <https://doi.org/10.7554/eLife.60188>  
688  
689

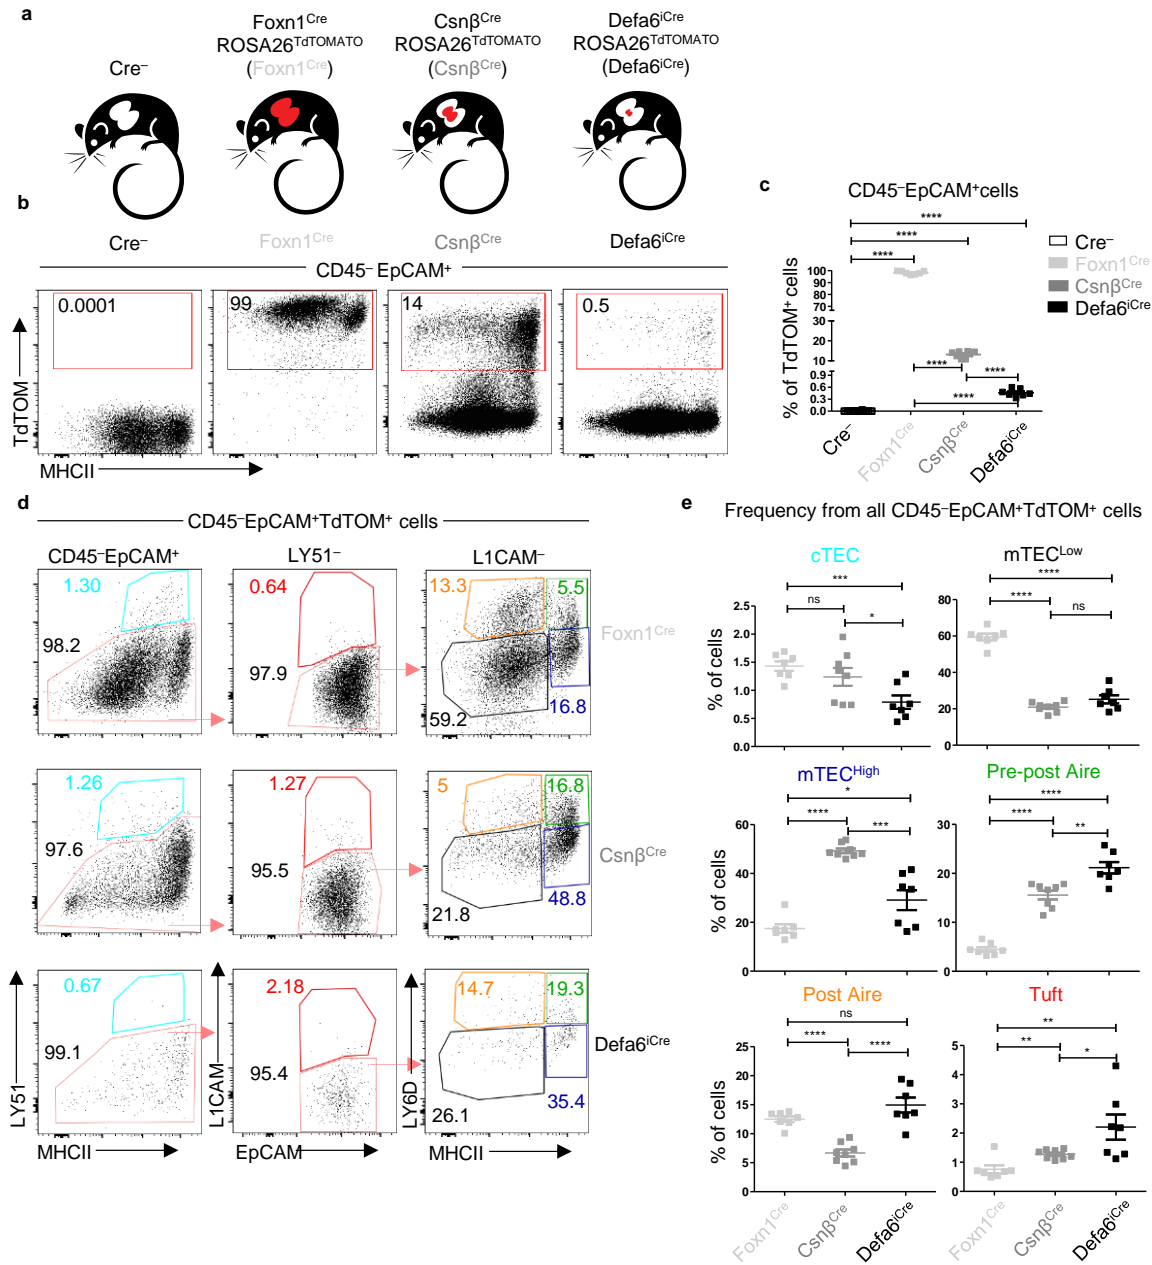

690

691

692 **Figure 1. The phenotype and frequency of TEC subsets in Cre-based mouse models of**  
693 **CAT. (a)** Mouse models of CAT with confined expression of TdTOM to distinct TEC subsets.  
694 **(b)** Representative flow cytometry plots showing the frequency of TdTOM<sup>+</sup> cells among  
695 CD45<sup>-</sup>EpCAM<sup>+</sup> cells isolated from a MACS-enriched CD45<sup>-</sup> thymic population from  
696 Foxn1<sup>Cre</sup>ROSA26<sup>TdTOM</sup> (Foxn1<sup>Cre</sup>), Csnβ<sup>Cre</sup>ROSA26<sup>TdTOM</sup> (Csnβ<sup>Cre</sup>) and  
697 Defa6<sup>iCre</sup>ROSA26<sup>TdTOM</sup> (Defa6<sup>iCre</sup>) mice. **(c)** Quantification of TdTOM<sup>+</sup> cells from Fig. 1b  
698 (mean ± SEM, *n*=7-12 mice from 3 independent experiments). **(d)** Representative comparative  
699 flow cytometry plots of different TEC subsets in Foxn1<sup>Cre</sup>, Csnβ<sup>Cre</sup> and Defa6<sup>iCre</sup> mice. **(e)**  
700 Quantification of TEC subset frequencies from plots in Fig. 1d (mean ± SEM, *n*=7-8 mice from  
701 3 independent experiments). Statistical analysis in (c) and (e) was performed using an unpaired,  
702 two-tailed Student's t-test, *p*≤0.05 = \*, *p*≤0.01 = \*\*, *p*≤0.001 \*\*\*, *p*<0.0001 = \*\*\*\*, ns = not  
703 significant.

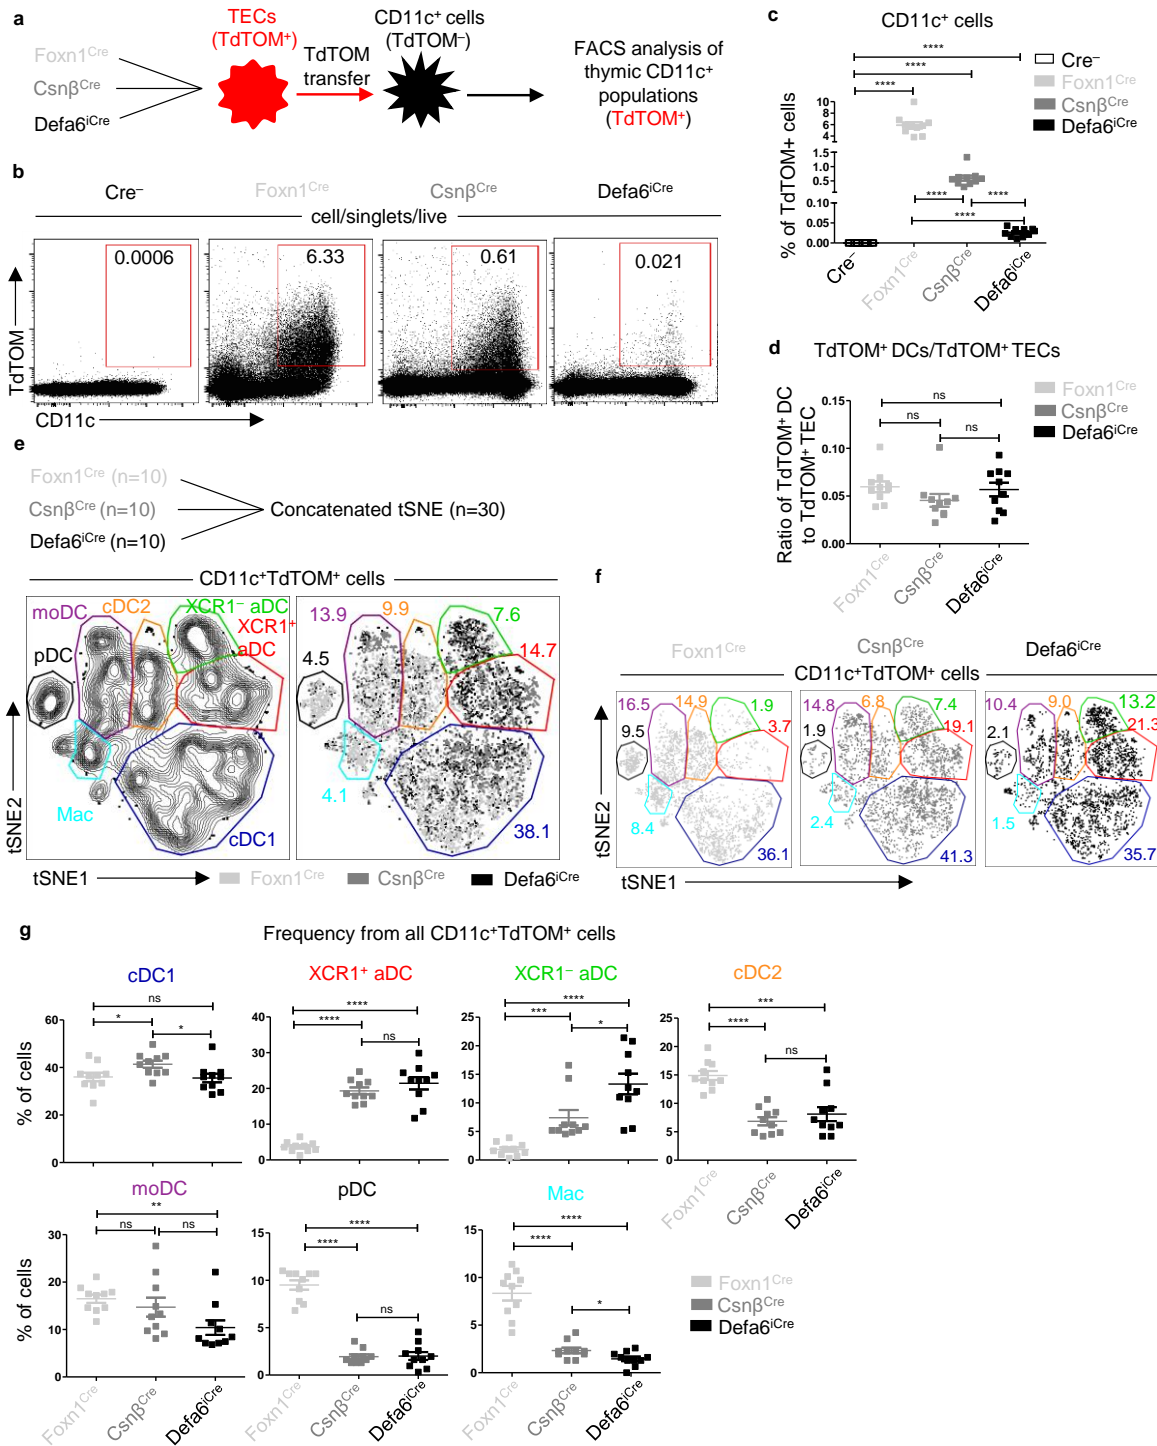

704

705



706 **Figure 2. Antigen transfer of TdTOM to thymic dendritic cells.** (a) Experimental design.  
707 (b) Representative flow cytometry plots comparing the frequency of TdTOM<sup>+</sup>CD11c<sup>+</sup> cells  
708 among MACS-enriched CD11c<sup>+</sup> thymic cells from mice models described in (a). (c)  
709 Quantification of TdTOM<sup>+</sup>CD11c<sup>+</sup> cells from (b) (mean ± SEM, *n*=10 mice from minimum of  
710 3 independent experiments). (d) Comparison of the ratio between the frequency of  
711 TdTOM<sup>+</sup>CD11c<sup>+</sup> (quantified in c) to TdTOM<sup>+</sup> TEC (quantified in Fig. 1c) subsets in mice  
712 models described in (a) (mean ± SEM, *n*=10 mice from minimum of 3 independent  
713 experiments). (e) Concatenated (*n*=30 mice) and (f) separate (*n*=10 mice) flow cytometry tSNE  
714 analysis of TdTOM<sup>+</sup>CD11c<sup>+</sup> cells from the three mice models described in (a). (g)  
715 Quantification of TdTOM<sup>+</sup>CD11c<sup>+</sup> subset frequencies described in (e) (mean ± SEM, *n*=10  
716 mice from minimum of 3 independent experiments). Statistical analysis in (c), (d), and (g) was  
717 performed using an unpaired, two-tailed Student's t-test,  $p \leq 0.05 = *$ ,  $p \leq 0.01 = **$ ,  $p \leq 0.001 = ***$ ,  
718  $p < 0.0001 = ****$ , ns = not significant.

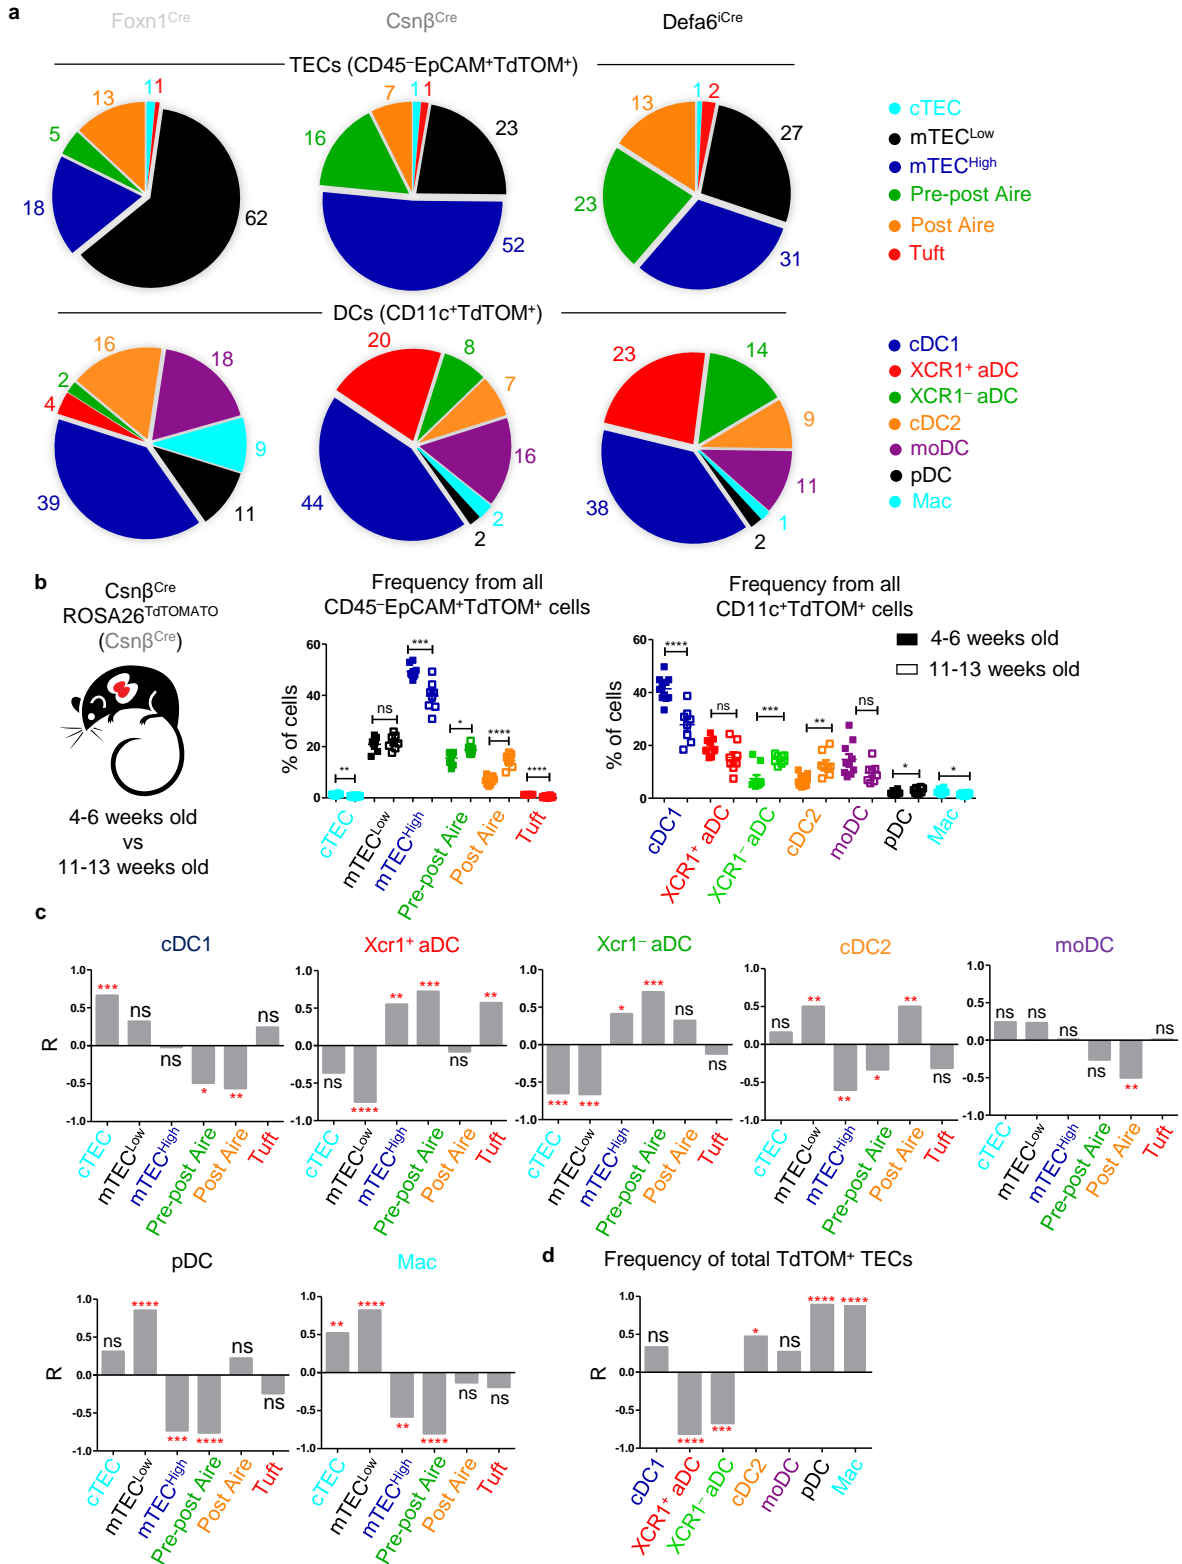

719

720

721 **Figure 3. TdTOM antigen transfer to distinct thymic DC subsets correlates with its confined**  
722 **expression in phenotypically defined subsets of TECs. (a)** Pie chart visualization of the  
723 frequency of TEC subsets from all CD45<sup>-</sup>EpCAM<sup>+</sup>TdTOM<sup>+</sup> cells (from Figure 1e) (upper part)  
724 and DC subsets from all CD11c<sup>+</sup>TdTOM<sup>+</sup> cells (from Fig. 2g) (lower part) from all described mice  
725 models. **(b)** Comparison of the frequency of TEC and DC subsets from all TdTOM<sup>+</sup> cells between  
726 young (4-6 weeks old) and older (11-13 weeks old) Csnβ<sup>Cre</sup>ROSA26<sup>TdTOM</sup> (Csnβ<sup>Cre</sup>) mice (mean ±  
727 SEM, *n*=8-10 mice from a minimum of 3 independent experiments). Statistical analysis was  
728 performed using unpaired, two-tailed Student's t-test, *p*≤0.05 = \*, *p*≤0.01 = \*\*, *p*≤0.001 \*\*\*,  
729 *p*<0.0001 = \*\*\*\*, ns = not significant. **(c)** Bar charts showing linear regression (*R*) between the  
730 frequencies of TdTOM<sup>+</sup> TECs and the indicated subset of TdTOM<sup>+</sup> DCs from (a) and (b) (*n*=5-8  
731 mice, from a minimum of 3 independent experiments). **(d)** Bar chart showing *R* between the  
732 frequency of TdTOM<sup>+</sup> DCs from (a) and (b) and frequency of all TdTOM<sup>+</sup> TECs from Fig. 1b  
733 (*n*=8-10 mice from a minimum of 3 independent experiments). Statistical analysis in (c) and (d)  
734 was performed using a Pearson's product-moment correlation, *p*≤0.05 = \*, *p*≤0.01 = \*\*,  
735 *p*≤0.001 \*\*\*, *p*<0.0001 = \*\*\*\*, ns = not significant.

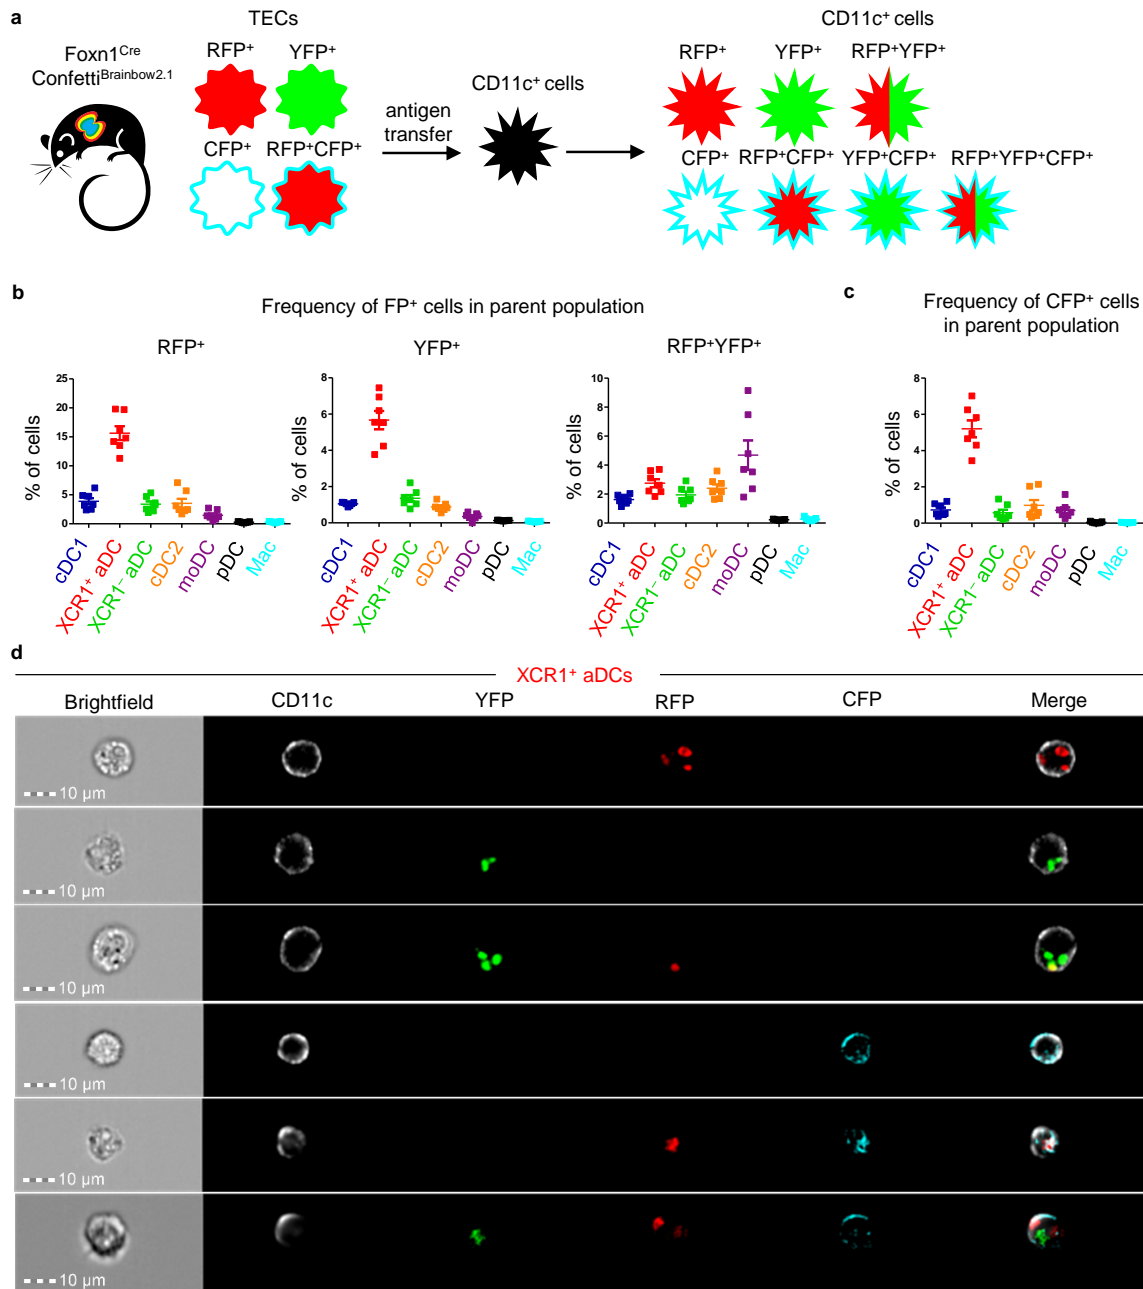

736

737 **Figure 4. Thymic moDCs efficiently acquire antigens from two or more TEC cells in**

738 **Foxn1<sup>Cre</sup>Confetti<sup>Brainbow2.1</sup> mouse model. (a) Experimental design. (b) Quantification of the**

739 **frequency of Fluorescent Protein<sup>+</sup> (FP<sup>+</sup>) cells among the indicated DC subsets (mean ± SEM,**

740 ***n*=7 mice from 3 independent experiments). (c) Quantification of the frequency of CFP<sup>+</sup> cells**

741 **among the indicated DC subsets (mean ± SEM, *n*=7 mice from 3 independent experiments).**

742 **(d) Representative images from ImageStream analysis showing the localization of transferred**

743 **FP in XCR1<sup>+</sup> aDC from the thymus of Foxn1<sup>Cre</sup>Confetti<sup>Brainbow2.1</sup> (*n*=2 independent**

744 **experiments).**

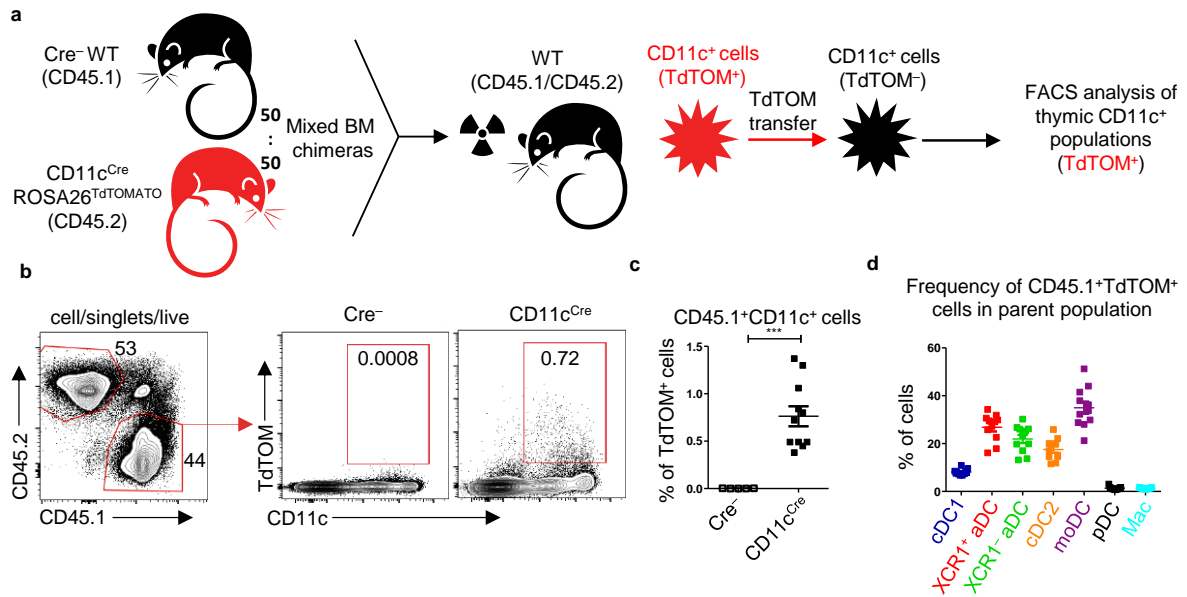

745

746 **Figure 5. Thymic CD11c<sup>+</sup> cells can share their antigens between each other. (a)**

747 Experimental design. **(b)** Representative flow cytometry plots showing the frequency of

748 CD45.1<sup>+</sup>CD11c<sup>+</sup>TdTOM<sup>+</sup> cells among MACS-enriched CD11c<sup>+</sup> thymic cells from mixed,

749 bone marrow chimeras (50:50) of WT (CD45.1<sup>+</sup>) and CD11c<sup>Cre</sup>ROSA26<sup>TdTOM</sup> (CD45.2<sup>+</sup>) mice.

750 **(c)** Quantification of CD45.1<sup>+</sup>TdTOM<sup>+</sup>CD11c<sup>+</sup> cells from **(b)** (mean ± SEM, n=11 mice from

751 2 independent experiments). Statistical analysis was performed using unpaired, two-tailed

752 Student's t-test, p≤0.001\*\*\*. **(d)** Quantification of the frequency of TdTOM<sup>+</sup> cells among the

753 indicated DC subsets from reconstituted mice described in **(a)** (mean ± SEM, n=11 mice from

754 2 independent experiments).

a

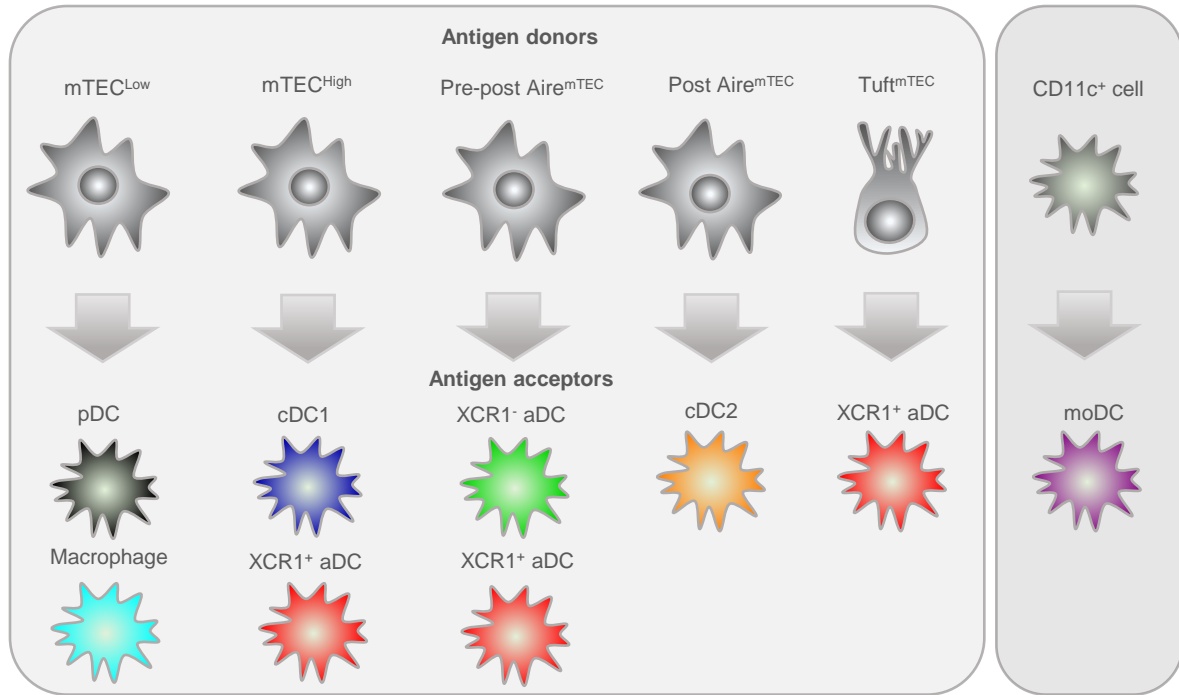

755

756

757

758

759

760

761

762

**Figure 6. Proposed model of preferential pairing in CAT.** (a) Based on the data presented in this study, we postulate that phenotypically defined subsets of thymic CD11c<sup>+</sup> cells preferentially and predictably acquire antigens from distinct subsets of developmentally-related TECs (left panel). Our data also suggests that thymic moDC do not specifically prefer any particular subset of TECs and simultaneously are efficient in acquiring antigens from other CD11c<sup>+</sup> APCs (right panel). This suggests that moDCs generally act as cells that scavenge apoptotic TECs and APCs in the thymic medulla.

## **Supplementary information**

### **A model of preferential pairing between epithelial and dendritic cells in thymic antigen transfer**

Matouš Vobořil, Jiří Březina, Tomáš Brabec, Jan Dobeš, Ondřej Ballek, Martina Dobešová, Jasper Manning, Richard S. Blumberg and Dominik Filipp

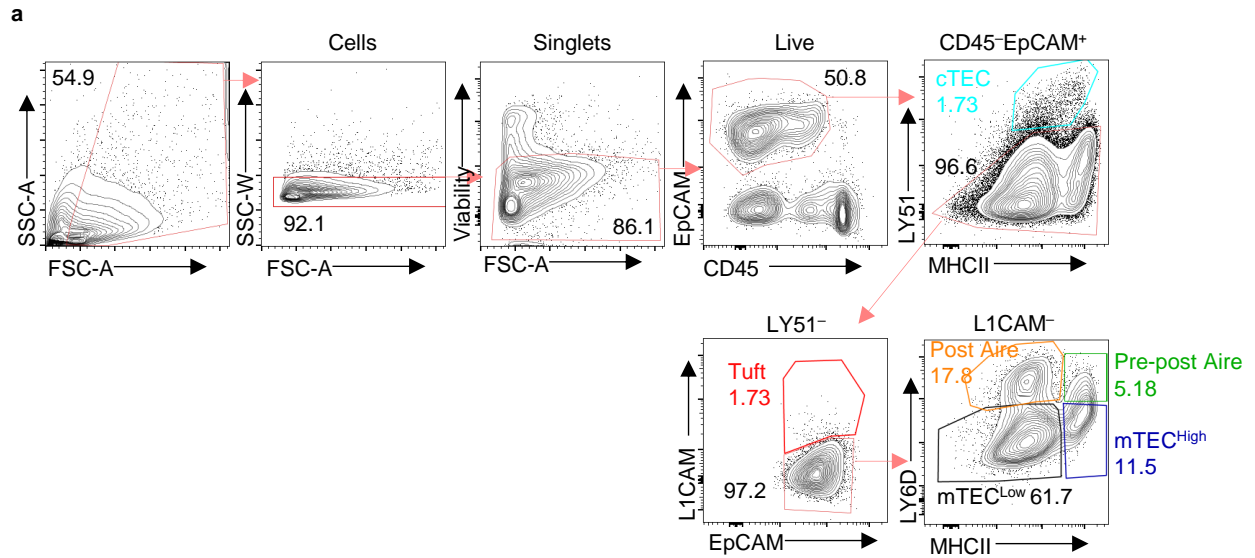

**Supplementary Figure 1, Related to Figure 1. Gating strategy of thymic epithelial cell populations.** (a) Complete gating strategy for the distinction of TEC populations. The thymic cell fraction was MACS enriched for CD45<sup>-</sup> cells and sequentially gated as singlets, live, and CD45<sup>-</sup> EpCAM<sup>+</sup> cells. The fraction of isolated TECs was then gated as cTECs (LY51<sup>+</sup>), Tuft mTECs (LY51<sup>-</sup>L1CAM<sup>+</sup>), and mTECs (LY51<sup>-</sup>L1CAM<sup>-</sup>). mTECs consists of four major populations: mTEC<sup>Low</sup> (MHCII<sup>Low</sup>LY6D<sup>-</sup>), mTEC<sup>High</sup> (MHCII<sup>High</sup>LY6D<sup>-</sup>), Pre-post Aire mTECs (MHCII<sup>High</sup>LY6D<sup>+</sup>), and Post Aire mTECs (MHCII<sup>High</sup>Ly6D<sup>High</sup>).



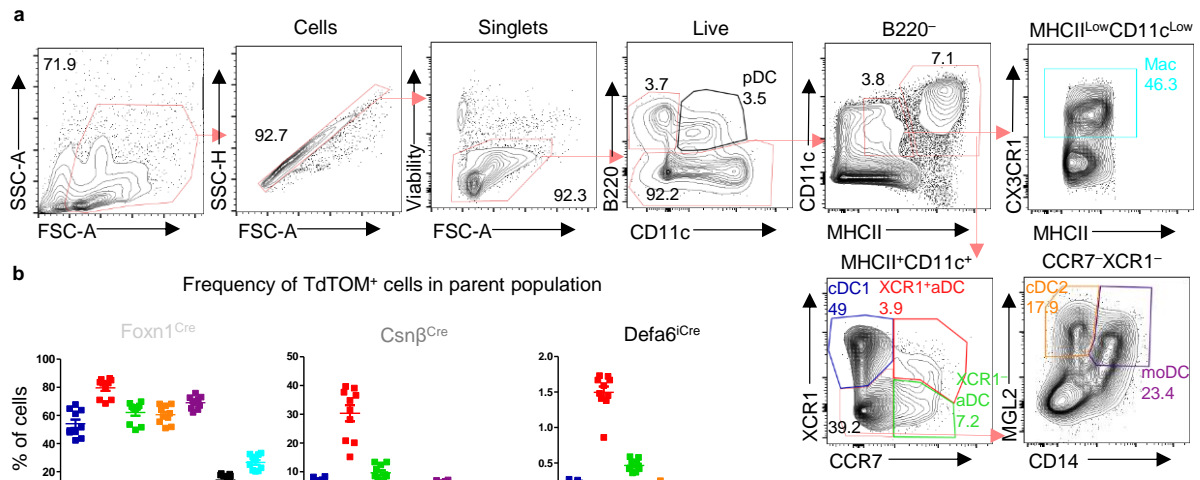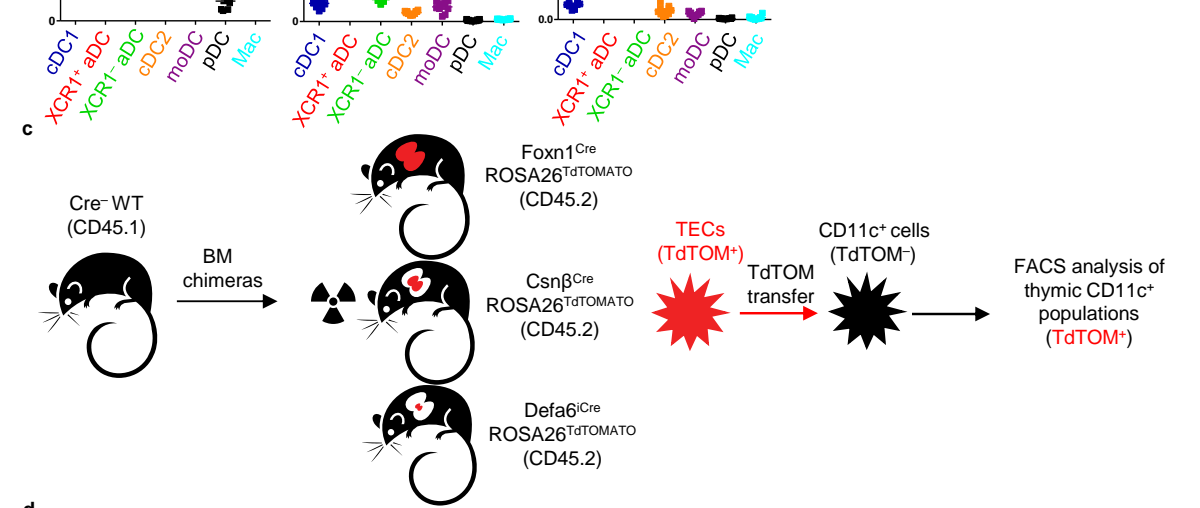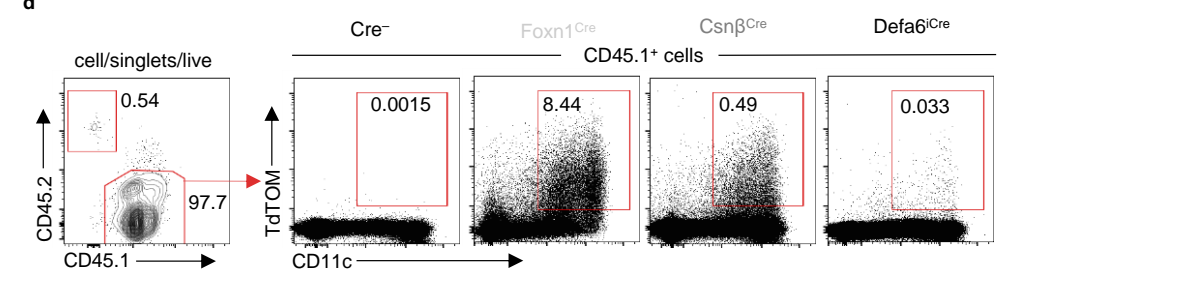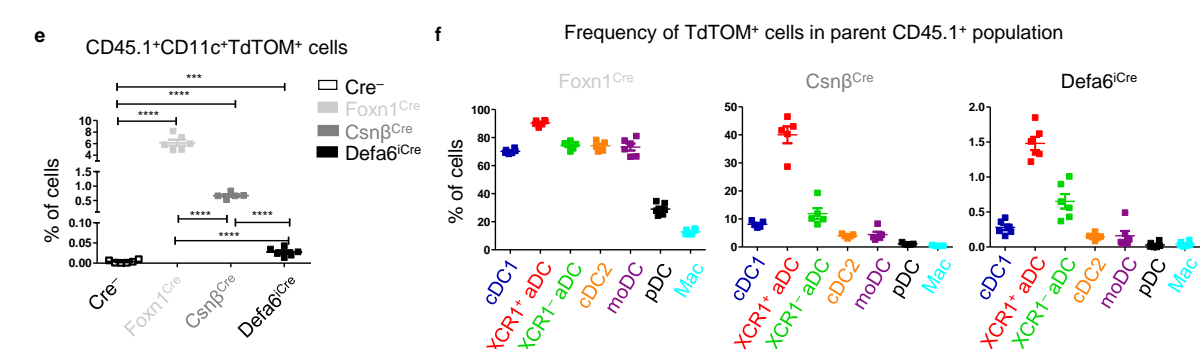

**Supplementary Figure 2, Related to Figure 2. Antigen transfer of TdTOMATO to thymic dendritic cells.** (a) Complete gating strategy for the isolation of thymic DC populations. The thymic cell fraction was MACS enriched for CD11c<sup>+</sup> cells and sequentially gated as singlets and live cells. This cell fraction was then depleted of pDCs (B220<sup>+</sup>CD11c<sup>Low</sup>) and divided into CD11c<sup>+</sup>MHCII<sup>+</sup> and CD11c<sup>Low</sup>MHCII<sup>Low</sup> populations. CD11c<sup>+</sup>MHCII<sup>+</sup> cells represent the major thymic DC populations: cDC1 (XCR1<sup>+</sup>CCR7<sup>-</sup>), XCR1<sup>+</sup> aDC (XCR1<sup>+</sup>CCR7<sup>+</sup>), XCR1<sup>-</sup> aDC (XCR1<sup>-</sup>CCR7<sup>+</sup>), cDC2 (XCR1<sup>-</sup>CCR7<sup>-</sup>MGL2<sup>+</sup>CD14<sup>-</sup>), and moDC (XCR1<sup>-</sup>CCR7<sup>-</sup>MGL2<sup>+</sup>CD14<sup>+</sup>). CD11c<sup>Low</sup>MHCII<sup>Low</sup> cells contain CX3CR1<sup>+</sup>, a macrophage-like population (Mac). Historically, SIRP $\alpha$  gating was used to distinguish cDC1 from cDC2 subsets. Since the XCR1 and CCR7 gating enables us to distinguish several subsets of thymic DCs, we omitted SIRP $\alpha$  from our gating strategy. (b) Quantification of the frequencies of TdTOM<sup>+</sup> cells among the indicated DC subsets (mean  $\pm$  SEM,  $n=10$  from minimum of 3 independent experiments). (c) Experimental design. (d) Representative flow cytometry plots comparing the frequency of CD45.1<sup>+</sup>TdTOM<sup>+</sup>CD11c<sup>+</sup> cells among MACS-enriched CD11c<sup>+</sup> thymic cells from the mouse models described in (c). (e) Quantification of CD45.1<sup>+</sup>TdTOM<sup>+</sup>CD11c<sup>+</sup> cells from (d) (mean  $\pm$  SEM,  $n=5-6$  mice from 2 independent experiments). (f) Quantification of the frequency of TdTOM<sup>+</sup> cells among the indicated DC subsets from mice described in (c) (mean  $\pm$  SEM,  $n= 5-6$  mice from 2 independent experiments).

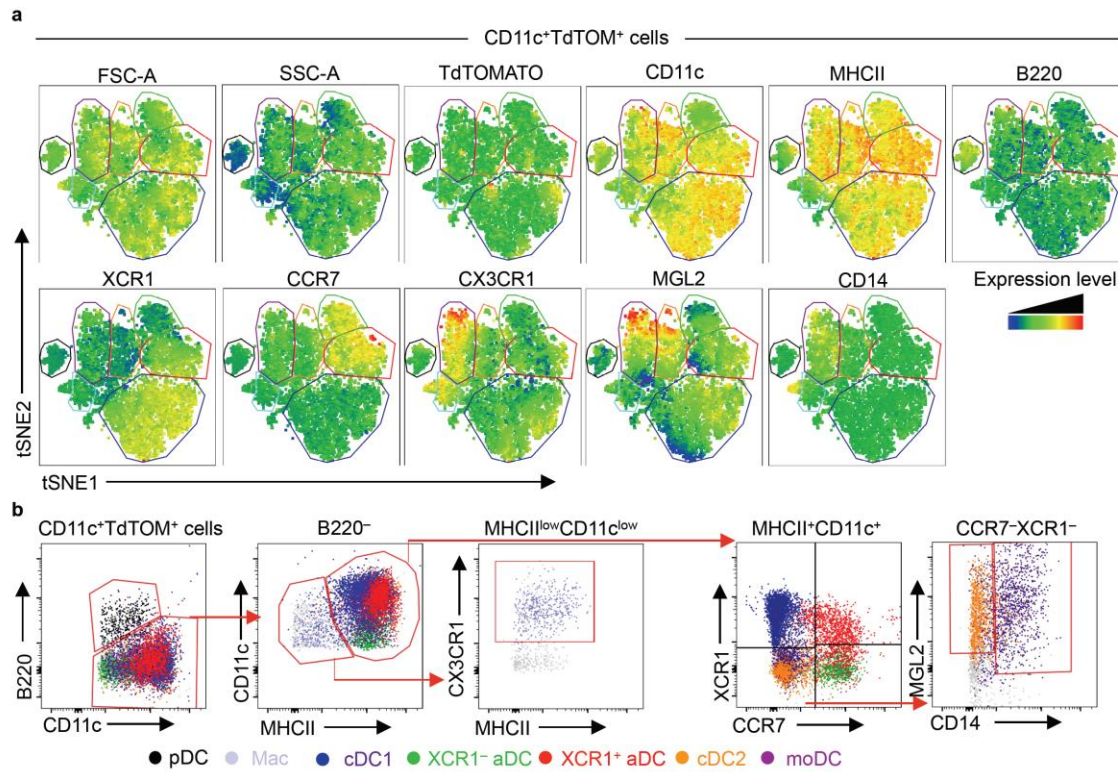

**Supplementary Figure 3, Related to Figure 2. Thymic dendritic cell gating strategy defined by flow cytometry tSNE analysis. (a)** Heat map generated from flow cytometry tSNE analysis of TdTOM<sup>+</sup>CD11c<sup>+</sup> cell populations from Figure 2d. tSNE analysis was performed using FlowJO software, based on the FSC-A, SSC-A, TdTOMATO, CD11c, MHCII, B220, XCR1, CCR7, CX3CR1, MGL2, and CD14. **(b)** Back-gating of TdTOM<sup>+</sup>CD11c<sup>+</sup> populations defined in (a), onto the CD11c<sup>+</sup> gating strategy described in Supplementary Figure 2a.

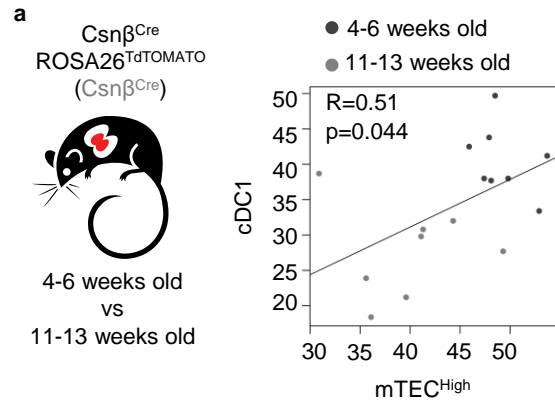

**Supplementary Figure 4, Related to Figure 3. The TdTOMATO antigen transfer to cDC1 subset correlates with its expression in mTEC<sup>High</sup>.** (a) Linear regression (R) between frequencies of TdTOM<sup>+</sup> mTEC<sup>High</sup> and TdTOM<sup>+</sup> cDC1 from Csn $\beta$ <sup>Cre</sup> mice described in Figure 3b ( $n=8$  mice from minimum of 3 independent experiments). Statistical analysis was performed by Pearson's product-moment correlation.

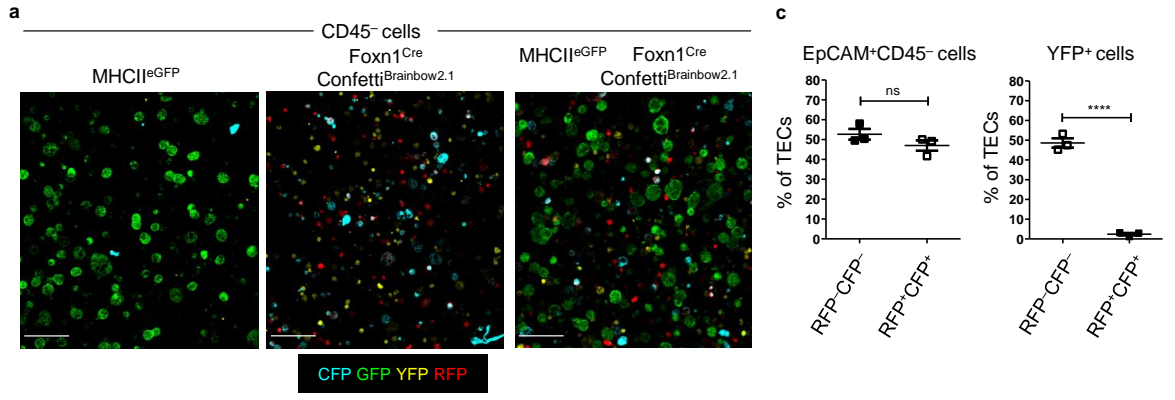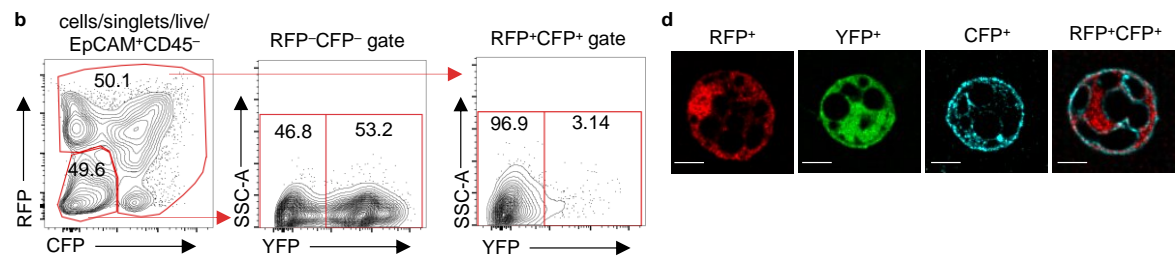

**e**

RFP<sup>+</sup>

|                       | cDC1 | XCR1 <sup>+</sup> aDC | XCR1 <sup>-</sup> aDC | cDC2 | moDC | pDC  | Mac  |
|-----------------------|------|-----------------------|-----------------------|------|------|------|------|
| cDC1                  | -    | ****                  | ns                    | ns   | **   | ***  | **** |
| XCR1 <sup>+</sup> aDC | **** | -                     | ****                  | **** | ***  | **** | **** |
| XCR1 <sup>-</sup> aDC | ns   | ****                  | -                     | ns   | **   | ***  | **** |
| cDC2                  | ns   | ****                  | ns                    | -    | **   | **   | **   |
| moDC                  | ***  | ****                  | **                    | **   | -    | **   | **   |
| pDC                   | ***  | ****                  | **                    | **   | **   | -    | ns   |
| Mac                   | ***  | ****                  | ***                   | **   | **   | ns   | -    |

RFP<sup>+</sup>YFP<sup>+</sup>

|                       | cDC1 | XCR1 <sup>+</sup> aDC | XCR1 <sup>-</sup> aDC | cDC2 | moDC | pDC  | Mac  |
|-----------------------|------|-----------------------|-----------------------|------|------|------|------|
| cDC1                  | -    | **                    | ns                    | *    | *    | **** | **** |
| XCR1 <sup>+</sup> aDC | **   | -                     | ***                   | *    | *    | **** | **** |
| XCR1 <sup>-</sup> aDC | ns   | ***                   | -                     | ***  | *    | ***  | **** |
| cDC2                  | *    | **                    | ***                   | -    | **   | ***  | **   |
| moDC                  | *    | *                     | *                     | *    | -    | **   | **   |
| pDC                   | **** | ****                  | ***                   | ***  | **   | -    | ns   |
| Mac                   | **** | ****                  | ****                  | **   | **   | ns   | -    |

**f**

YFP<sup>+</sup>

|                       | cDC1 | XCR1 <sup>+</sup> aDC | XCR1 <sup>-</sup> aDC | cDC2 | moDC | pDC  | Mac  |
|-----------------------|------|-----------------------|-----------------------|------|------|------|------|
| cDC1                  | -    | ****                  | ns                    | ns   | ns   | ***  | **   |
| XCR1 <sup>+</sup> aDC | **** | -                     | ***                   | **** | ***  | **** | **** |
| XCR1 <sup>-</sup> aDC | ns   | ****                  | -                     | ns   | **   | *    | *    |
| cDC2                  | ns   | ****                  | ns                    | -    | **   | ***  | ***  |
| moDC                  | ***  | ****                  | **                    | **   | -    | *    | **   |
| pDC                   | **** | ****                  | ***                   | ***  | **   | *    | **** |
| Mac                   | **** | ****                  | ***                   | ***  | **   | ***  | -    |

CFP<sup>+</sup>

|                       | cDC1 | XCR1 <sup>+</sup> aDC | XCR1 <sup>-</sup> aDC | cDC2 | moDC | pDC  | Mac  |
|-----------------------|------|-----------------------|-----------------------|------|------|------|------|
| cDC1                  | -    | ****                  | ns                    | ns   | ns   | ***  | **   |
| XCR1 <sup>+</sup> aDC | **** | -                     | ****                  | **** | **** | **** | **** |
| XCR1 <sup>-</sup> aDC | ns   | ****                  | -                     | *    | ns   | *    | *    |
| cDC2                  | ns   | ****                  | *                     | -    | ns   | *    | *    |
| moDC                  | ns   | ****                  | ns                    | ns   | -    | **   | **   |
| pDC                   | ***  | ****                  | *                     | *    | **   | -    | ns   |
| Mac                   | **   | ****                  | *                     | *    | **   | ns   | -    |

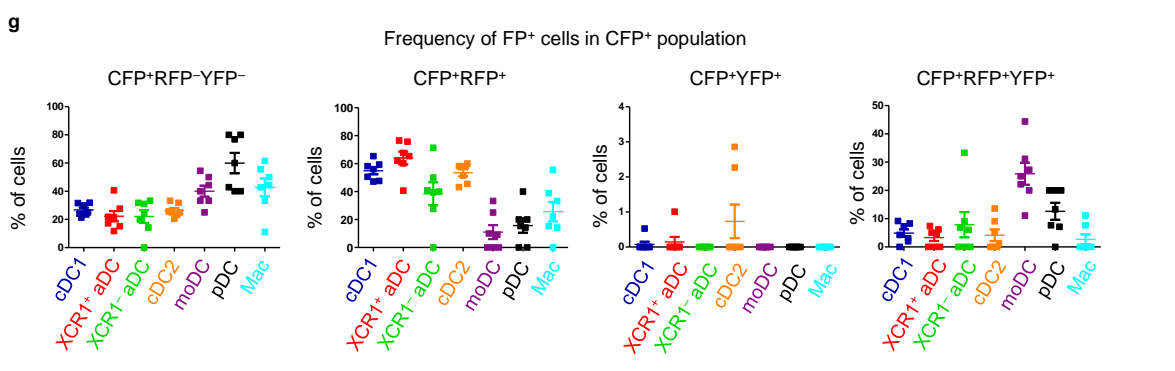

**Supplementary Figure 5, Related to Figure 4. Foxn1<sup>Cre</sup>Confetti<sup>Brainbow2.1</sup> as a model of thymic cooperative antigen transfer.** (a) Representative microscopic images of sorted TECs from MHCII<sup>eGFP</sup> (left panel), Foxn1<sup>Cre</sup>Confetti<sup>Brainbow2.1</sup> (middle panel) and a mixed population of TECs isolated from both MHCII<sup>eGFP</sup> and Foxn1<sup>Cre</sup>Confetti<sup>Brainbow2.1</sup> (right panels) mouse models. (b) Representative flow cytometry plots showing the frequency of YFP, RFP and CFP<sup>+</sup> CD45<sup>-</sup> EpCAM<sup>+</sup> TECs. (c) Quantification of FP<sup>+</sup> cells from (b) (mean ± SEM, *n*=3 mice from 2 independent experiments). (d) Representative microscopic images of all TEC variants from the model described in Figure 5a. (e), (f) Statistical analysis of the frequency of FP<sup>+</sup> cells among the indicated DC subsets from Figure 4b and c (*n*=7 mice from 3 independent experiments). Analysis was performed using a paired, two-tailed Student's t-test, *p*≤0.05 = \*, *p*≤0.01 = \*\*, *p*≤0.001 \*\*\*, *p*<0.0001 = \*\*\*\*, ns = not significant. (g) Quantification of the frequency of FP<sup>+</sup> cells among the CFP<sup>+</sup> DC subsets (mean ± SEM, *n*=7 from 3 independent experiments).



**Supplementary Figure 6, Related to Figure 5. Thymic CD11c<sup>+</sup> cells can share their antigens between each other.** (a) Representative flow cytometry plots showing gating and frequency of CD11c<sup>+</sup>TdTOM<sup>+</sup> cells from mixed, bone marrow chimera of WT (CD45.1<sup>+</sup>, lower panel) and CD11c<sup>Cre</sup>ROSA26<sup>TdTOMATO</sup> (CD45.2<sup>+</sup>, upper panel) mice. (b) Statistical analysis of the frequency of TdTOM<sup>+</sup> cells among the indicated DC subsets from Figure 5d (*n*=11 mice from 2 independent experiments). Analysis was performed using a paired, two-tailed Student's t-test,  $p \leq 0.01 = **$ ,  $p \leq 0.001 = ***$ ,  $p < 0.0001 = ****$ , ns = not significant.



**Supplementary Table 1. List of antibodies**

| <b>Antibody</b>                   | <b>Manufacturer</b> | <b>Clone</b> | <b>Catalogue number</b> | <b>Dilution</b> |
|-----------------------------------|---------------------|--------------|-------------------------|-----------------|
| Anti-mouse CCR7-APC               | BioLegend           | 4B12         | cat# 120108             | 1:100           |
| Anti-mouse CCR7-PE/Cy7            | BioLegend           | 4B12         | cat# 120124             | 1:200           |
| Anti-mouse CD11c-APC/Cy7          | BioLegend           | N418         | cat# 117324             | 1:200           |
| Anti-mouse CD11c-Biotin           | eBioscience         | N418         | cat# 13-0114-82         | 1:100           |
| Anti-mouse CD14-APC               | BioLegend           | Sa2-8        | cat# 123312             | 1:100           |
| Anti-mouse CD14-FITC              | BioLegend           | Sa2-8        | cat# 123308             | 1:100           |
| Anti-mouse CD301b (Mgl2)-PE/Cy7   | BioLegend           | URA-1        | cat# 146807             | 1:200           |
| Anti-mouse CD326 (EpCAM)-PE/Cy7   | BioLegend           | G8.8         | cat# 118215             | 1:3000          |
| Anti-mouse CD45.1-PerCP/Cy5.5     | BioLegend           | A20          | cat# 110727             | 1:150           |
| Anti-mouse CD45.2-FITC            | BioLegend           | 104          | cat# 109806             | 1:150           |
| Anti-mouse CD45-BV605             | BioLegend           | 30-F11       | cat# 103155             | 1:100           |
| Anti-mouse CX3CR1-BV421           | BioLegend           | SA011F11     | cat# 149023             | 1:200           |
| Anti-mouse I-A/I-E-BV711          | BioLegend           | M5/114.15.2  | cat# 107625             | 1:500           |
| Anti-mouse I-A/I-E-PB             | BioLegend           | M5/114.15.2  | cat# 138606             | 1:500           |
| Anti-mouse L1CAM-APC/Cy7          | Novus Biologicals   | UJ127.11     | cat# 2682APCCY7         | 1:50            |
| Anti-mouse Ly-51-AF647            | BioLegend           | 6C3          | cat# 108311             | 1:200           |
| Anti-mouse Ly6D-FITC              | BioLegend           | 49-H4        | cat# 107620             | 1:200           |
| Anti-mouse/human CD45R/B220-BV785 | BioLegend           | RA3-6B2      | cat# 103246             | 1:100           |
| Anti-mouse/rat XCR1-APC           | BioLegend           | ZET          | cat# 148206             | 1:200           |
| Anti-mouse/rat XCR1-BV421         | BioLegend           | ZET          | cat# 148216             | 1:200           |
| Anti-mouse/rat XCR1-PerCP/Cy5.5   | BioLegend           | ZET          | cat# 148208             | 1:200           |
| Fixable Viability Dye-eFluor 506  | eBioscience         | -            | cat# 65-0866-14         | 1:300           |
| Streptavidin-APC/Cy7              | BioLegend           | -            | cat# 405208             | 1:500           |
